# Supplementary material for: Plasma metabolome and cognitive skills in Down syndrome
Source: PubMed Central journal article supplement (PMC7319960; doi:10.1038/s41598-020-67195-z), 2020-06-26
Supplement: 41598_2020_67195_MOESM2_ESM.pdf [file 41598_2020_67195_MOESM2_ESM.pdf]

## Supplementary Material

### Plasma metabolome and cognitive skills in Down syndrome

Francesca Antonaros<sup>1†</sup>, Veronica Ghini<sup>†2</sup>, Francesca Pulina<sup>†3</sup>, Giuseppe Ramacieri<sup>1</sup>, Elena Cicchini<sup>1</sup>, Elisa Mannini<sup>1</sup>, Anna Martelli<sup>4</sup>, Agnese Feliciello<sup>4</sup>, Silvia Lanfranchi<sup>3</sup>, Sara Onnivello<sup>3</sup>, Renzo Vianello<sup>3</sup>, Chiara Locatelli<sup>5</sup>, Guido Cocchi<sup>4</sup>, Maria Chiara Pelleri<sup>1</sup>, Lorenza Vitale<sup>1</sup>, Pierluigi Strippoli<sup>1</sup>, Claudio Luchinat<sup>6</sup>, Paola Turano<sup>6\*</sup>, Allison Piovesan<sup>1\*</sup>, Maria Caracausi<sup>1</sup>

† These Authors equally contributed to the work

<sup>1</sup>Department of Experimental, Diagnostic and Specialty Medicine, (DIMES), Unit of Histology, Embryology and Applied Biology, University of Bologna, Via Belmeloro 8, 40126 Bologna, BO, Italy.

<sup>2</sup>CERM, Center of Magnetic Resonance, University of Florence, via Luigi Sacconi 6, 50019 Sesto Fiorentino, Florence, Italy. CIRMMP, Consorzio Interuniversitario Risonanze Magnetiche metallo proteine, via Luigi Sacconi 6, 50019 Sesto Fiorentino, Florence, FI, Italy.

<sup>3</sup>Department of Developmental Psychology and Socialisation, University of Padova, Via Venezia 8, 35131, Padova, PD, Italy

<sup>4</sup>Neonatology Unit, St. Orsola-Malpighi Polyclinic, Department of Medical and Surgical Sciences (DIMEC), University of Bologna, Via Massarenti 9, 40138 Bologna, BO, Italy.

<sup>5</sup>Neonatology Unit, St. Orsola-Malpighi Polyclinic, Via Massarenti 9, 40138 Bologna, BO, Italy.

<sup>6</sup>Department of chemistry, University of Florence, via della Lastruccia 3, 50019 Sesto Fiorentino, Florence, FI, Italy.

\*Corresponding Authors

E-mail: turano@cerm.unifi.it

E-mail: allison.piovesan2@unibo.it

**Supplementary Figure S1. Representative PLS-CA analysis of a random selection of 46 DS and 46 CTRL samples derived from all plasma samples, repeated 500 times: (A) CPMG and (B) NOESY spectra. Representative PLS-CA analysis of a random selection of 35 DS and 35 CTRL samples derived from plasma samples of fasting subjects, repeated 500 times: (C) CPMG and (D) NOESY spectra.** In the score plots each dot represents a different plasma sample. Orange dots: Down syndrome samples; blue dots: healthy controls.

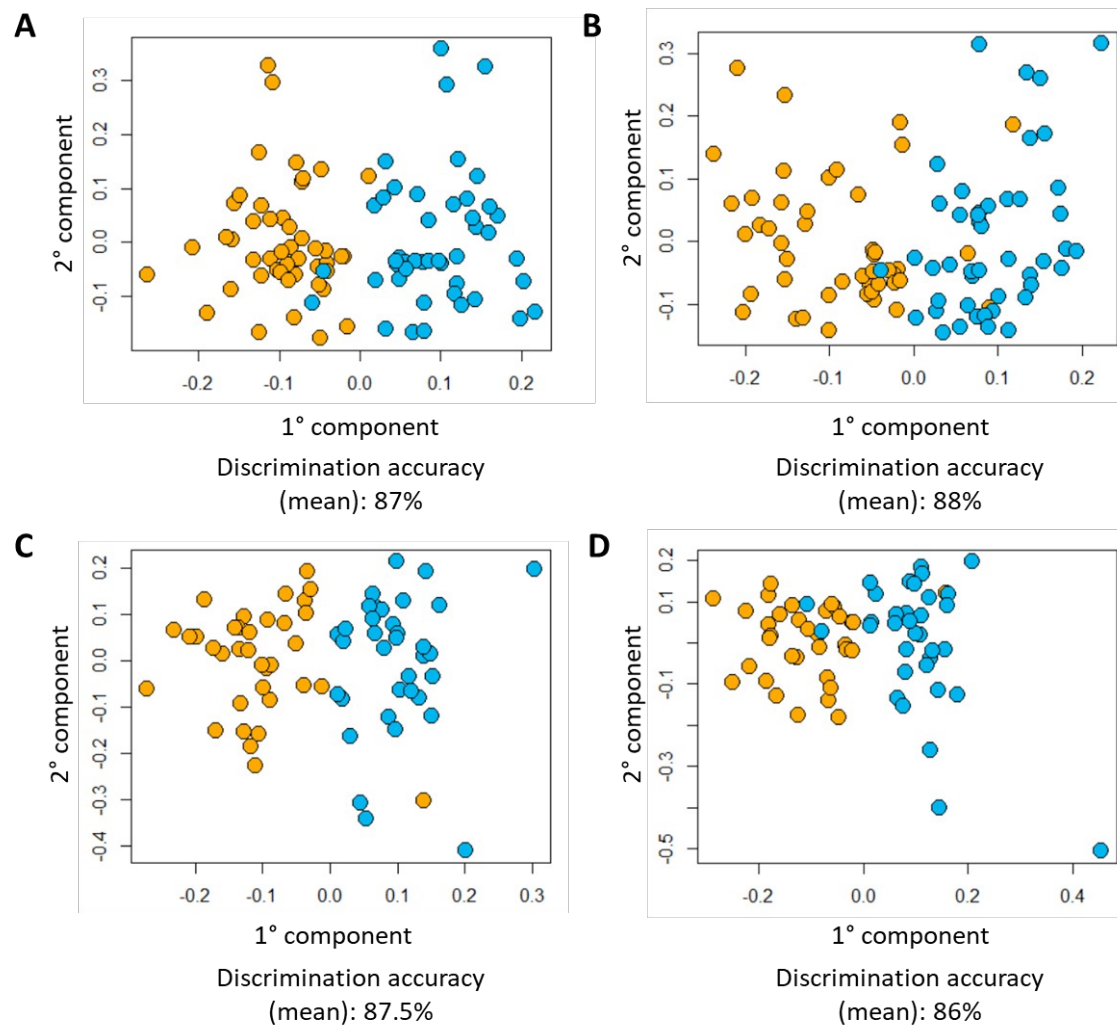

**Supplementary Figure S2. Representative PLS-CA analysis of a random selection of 22 DS and 22 CTRL samples derived from plasma samples of female subjects, repeated 500 times: (A) CPMG and (B) NOESY spectra. Representative PLS-CA analysis of a random selection of 24 DS and 24 CTRL samples derived from plasma samples of male subjects, repeated 500 times: (C) CPMG and (D) NOESY spectra.** In the score plots each dot represents a different plasma sample. Orange dots: Down syndrome samples; blue dots: healthy controls.

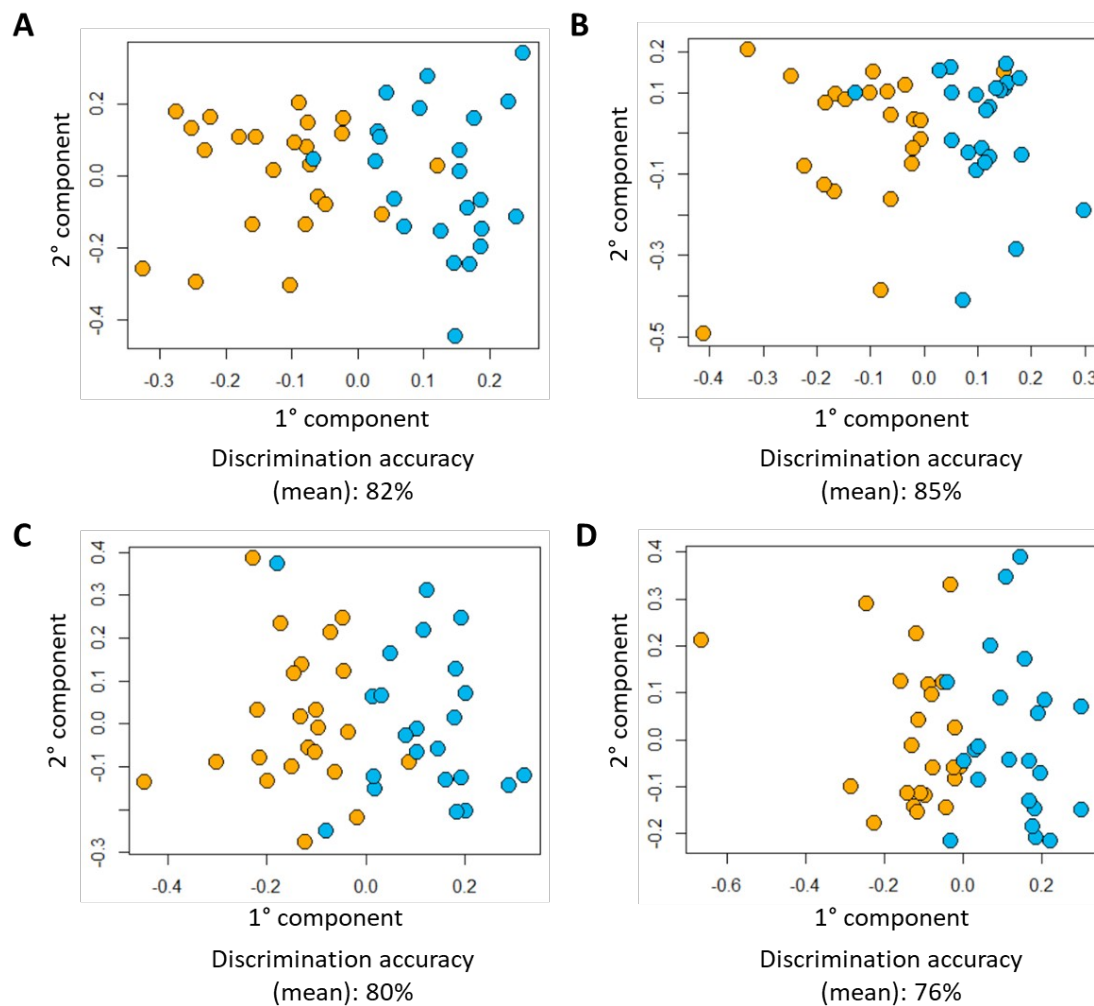

**Supplementary Figure S3. PLS-CA analysis to investigate if NMR-detectable part of plasma metabolome of DS patients contains signatures of the different IQ scores obtained by WPPSI tests.** Discrimination between samples from DS subjects with an IQ>40 (n=13) and from DS subjects an IQ≤40 (n=26). Score plot, each dot represents a different plasma sample. Orange dots: samples from DS subjects with an IQ>40; blue dots: samples from DS subjects with an IQ≤40. Confusion matrix and discrimination accuracy are also reported.

## WPPSI test

|         | IQ > 40 | IQ < 40 |
|---------|---------|---------|
| IQ > 40 | 63      | 37      |
| IQ < 40 | 20      | 80      |

**Discrimination Accuracy=74.5%**

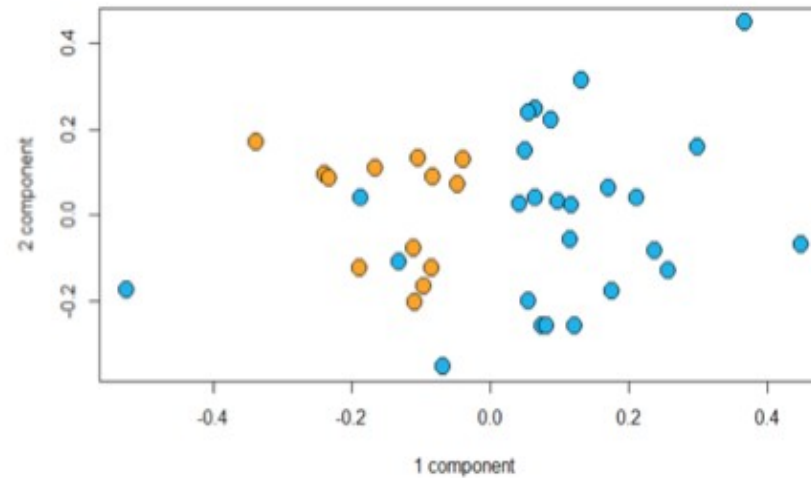

**Supplementary Figure S4. PLS-CA analysis to investigate if NMR-detectable part of plasma metabolome of DS patients contains signatures of the different IQ disability ranges obtained by Griffiths-III tests.** Discrimination between samples from DS subjects with an IQ>40 (n=17) and from DS subjects an IQ≤40 (n=5). Score plot, each dot represents a different plasma sample. Orange dots: samples from DS subjects with an IQ>40; blue dots: samples from DS subjects with an IQ≤40. Confusion matrix and discrimination accuracy are also reported.

## Griffiths test

|         | IQ > 40 | IQ < 40 |
|---------|---------|---------|
| IQ > 40 | 85      | 15      |
| IQ < 40 | 61      | 39      |

**Discrimination Accuracy=74.3%**

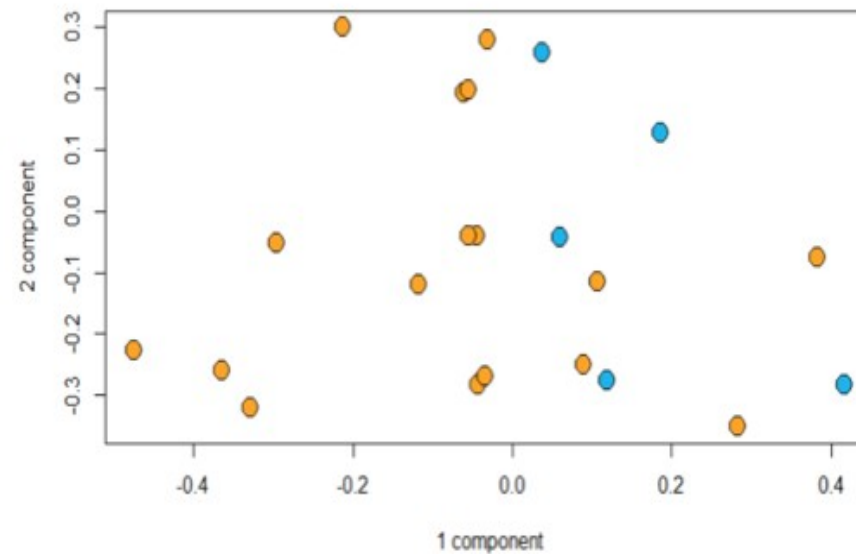

**Supplementary Table 1. Multivariate statistical analysis of correlations between metabolites involved in Krebs cycle and other metabolites (DS, n=129; CTRL, n=46).** The table contains the statistically significant correlations (in DS and/or CTRL group) between metabolites analyzed with 1H-NMR from plasma samples. We reported p-value of the univariate Wilcoxon test, p-value after FDR correction and r for each metabolite. Correlations with significant p-value after FDR correction (<0.01) are highlighted in red. Pairs with moderate correlation (0.4 < r < 0.7) are highlighted in green and pairs with strong correlation (r > 0.7) are highlighted in blue.

| Metabolite 1 | Metabolite 2      | DS Metabolites |                              |         | CTRL Metabolites |                              |         |
|--------------|-------------------|----------------|------------------------------|---------|------------------|------------------------------|---------|
|              |                   | P-value        | P-value after FDR correction | r       | P-value          | P-value after FDR correction | r       |
| pyruvate     | leucine           | < 0.001        | < 0.001                      | 0.3135  | 0.361            | 0.523                        | 0.1379  |
| pyruvate     | valine            | 0.001          | 0.003                        | 0.2831  | < 0.001          | < 0.001                      | 0.5755  |
| pyruvate     | alanine           | 0.006          | 0.014                        | 0.2388  | < 0.001          | < 0.001                      | 0.6332  |
| pyruvate     | acetone           | < 0.001        | < 0.001                      | 0.3086  | 0.167            | 0.291                        | 0.2074  |
| pyruvate     | glutamine         | 0.021          | 0.041                        | 0.2030  | 0.001            | 0.005                        | 0.4880  |
| pyruvate     | citrate           | < 0.001        | < 0.001                      | 0.3257  | 0.006            | 0.022                        | 0.3978  |
| pyruvate     | glycine           | 0.001          | 0.003                        | 0.2876  | < 0.001          | < 0.001                      | 0.6366  |
| pyruvate     | creatine          | < 0.001        | < 0.001                      | 0.3387  | 0.042            | 0.103                        | -0.3009 |
| pyruvate     | creatinine        | 0.016          | 0.032                        | 0.2122  | < 0.001          | < 0.001                      | 0.4951  |
| pyruvate     | lactate           | < 0.001        | < 0.001                      | 0.5644  | < 0.001          | < 0.001                      | 0.6894  |
| pyruvate     | glucose           | 0.651          | 0.728                        | 0.0402  | < 0.001          | < 0.001                      | 0.6335  |
| pyruvate     | mannose           | 0.904          | 0.932                        | 0.0108  | 0.005            | 0.019                        | 0.4031  |
| pyruvate     | tyrosine          | 0.362          | 0.444                        | -0.0808 | 0.002            | 0.009                        | 0.4370  |
| pyruvate     | histidine         | 0.004          | 0.010                        | 0.2537  | < 0.001          | < 0.001                      | 0.6441  |
| pyruvate     | fumarate          | 0.010          | 0.021                        | 0.2273  | 0.058            | 0.133                        | 0.2817  |
| pyruvate     | threonine         | 0.866          | 0.901                        | 0.0150  | 0.007            | 0.025                        | 0.3952  |
| pyruvate     | lysine            | < 0.001        | < 0.001                      | 0.3435  | 0.256            | 0.401                        | -0.1710 |
| pyruvate     | methionine        | 0.016          | 0.032                        | 0.2108  | < 0.001          | < 0.001                      | 0.5775  |
| pyruvate     | unk1              | 0.021          | 0.041                        | 0.2035  | 0.971            | 0.991                        | 0.0056  |
| pyruvate     | unk2              | < 0.001        | < 0.001                      | 0.5198  | 0.064            | 0.142                        | 0.2756  |
| pyruvate     | 3-hydroxybutyrate | 0.007          | 0.016                        | 0.2347  | 0.170            | 0.295                        | -0.2060 |
| pyruvate     | succinate         | < 0.001        | < 0.001                      | 0.3795  | < 0.001          | < 0.001                      | -0.5426 |
| pyruvate     | 2-hydroxybutyrate | < 0.001        | < 0.001                      | 0.3687  | 0.572            | 0.713                        | 0.0854  |
| pyruvate     | proline           | < 0.001        | < 0.001                      | 0.3281  | < 0.001          | < 0.001                      | -0.5362 |
| citrate      | leucine           | < 0.001        | < 0.001                      | 0.3179  | 0.391            | 0.553                        | 0.1296  |
| citrate      | valine            | 0.006          | 0.014                        | 0.2405  | 0.001            | 0.005                        | 0.4788  |
| citrate      | alanine           | 0.029          | 0.054                        | 0.1923  | 0.016            | 0.049                        | 0.3527  |
| citrate      | acetate           | 0.006          | 0.014                        | 0.2409  | 0.001            | 0.005                        | 0.4919  |
| citrate      | pyruvate          | < 0.001        | < 0.001                      | 0.3257  | 0.006            | 0.022                        | 0.3978  |
| citrate      | acetone           | < 0.001        | < 0.001                      | 0.3131  | 0.033            | 0.085                        | 0.3149  |
| citrate      | glutamine         | < 0.001        | < 0.001                      | 0.4807  | 0.005            | 0.019                        | 0.4052  |
| citrate      | glycine           | < 0.001        | < 0.001                      | 0.3514  | 0.005            | 0.019                        | 0.4092  |
| citrate      | creatine          | 0.001          | 0.003                        | 0.2774  | 0.484            | 0.634                        | -0.1059 |
| citrate      | creatinine        | < 0.001        | < 0.001                      | 0.3410  | 0.072            | 0.156                        | 0.2673  |
| citrate      | lactate           | 0.539          | 0.625                        | 0.0546  | < 0.001          | < 0.001                      | 0.6602  |
| citrate      | glucose           | < 0.001        | < 0.001                      | 0.3420  | < 0.001          | < 0.001                      | 0.6215  |
| citrate      | histidine         | < 0.001        | < 0.001                      | 0.4358  | 0.002            | 0.009                        | 0.4409  |
| citrate      | formate           | 0.029          | 0.054                        | 0.1918  | 0.002            | 0.009                        | 0.4429  |
| citrate      | fumarate          | 0.014          | 0.029                        | 0.2168  | 0.012            | 0.039                        | 0.3689  |
| citrate      | lysine            | < 0.001        | < 0.001                      | 0.3607  | 0.223            | 0.364                        | -0.1833 |
| citrate      | acetatoacetate    | < 0.001        | < 0.001                      | 0.3206  | 0.050            | 0.119                        | 0.2905  |
| citrate      | methionine        | 0.163          | 0.230                        | 0.1234  | < 0.001          | < 0.001                      | 0.5093  |
| citrate      | unk1              | < 0.001        | < 0.001                      | 0.3662  | 0.002            | 0.009                        | 0.4364  |
| citrate      | unk2              | 0.759          | 0.813                        | -0.0272 | 0.031            | 0.083                        | 0.3188  |
| citrate      | unk3              | 0.002          | 0.005                        | 0.2649  | 0.553            | 0.699                        | -0.0898 |
| citrate      | 3-hydroxybutyrate | < 0.001        | < 0.001                      | 0.3366  | 0.770            | 0.859                        | 0.0443  |
| citrate      | succinate         | < 0.001        | < 0.001                      | 0.3390  | 0.009            | 0.031                        | -0.3785 |
| citrate      | 2-hydroxybutyrate | < 0.001        | < 0.001                      | 0.4666  | 0.001            | 0.005                        | 0.4586  |
| citrate      | proline           | 0.003          | 0.008                        | 0.2572  | 0.019            | 0.056                        | -0.3447 |
| succinate    | leucine           | 0.007          | 0.016                        | 0.2362  | 0.055            | 0.127                        | 0.2850  |
| succinate    | isoleucine        | 0.234          | 0.303                        | 0.1056  | < 0.001          | < 0.001                      | 0.5689  |
| succinate    | valine            | 0.001          | 0.003                        | 0.2770  | < 0.001          | < 0.001                      | -0.5128 |
| succinate    | alanine           | 0.040          | 0.071                        | 0.1814  | < 0.001          | < 0.001                      | -0.5245 |
| succinate    | acetate           | 0.005          | 0.012                        | 0.2456  | 0.041            | 0.102                        | -0.3023 |
| succinate    | pyruvate          | < 0.001        | < 0.001                      | 0.3795  | < 0.001          | < 0.001                      | -0.5426 |
| succinate    | glutamine         | < 0.001        | < 0.001                      | 0.3457  | 0.766            | 0.856                        | -0.0451 |
| succinate    | citrate           | < 0.001        | < 0.001                      | 0.3390  | 0.009            | 0.031                        | -0.3785 |
| succinate    | glycine           | < 0.001        | < 0.001                      | 0.3963  | 0.005            | 0.019                        | -0.4096 |
| succinate    | creatine          | 0.002          | 0.005                        | 0.2765  | < 0.001          | < 0.001                      | 0.7243  |
| succinate    | creatinine        | 0.017          | 0.034                        | 0.2097  | 0.096            | 0.193                        | -0.2486 |
| succinate    | lactate           | < 0.001        | < 0.001                      | 0.4360  | 0.002            | 0.009                        | -0.4375 |
| succinate    | glucose           | 0.001          | 0.003                        | 0.2884  | < 0.001          | < 0.001                      | -0.5852 |

|           |                   |         |         |        |         |         |         |
|-----------|-------------------|---------|---------|--------|---------|---------|---------|
| succinate | mannose           | 0.077   | 0.122   | 0.1562 | 0.015   | 0.048   | -0.3574 |
| succinate | histidine         | 0.006   | 0.014   | 0.2410 | 0.019   | 0.056   | -0.3453 |
| succinate | formate           | 0.009   | 0.019   | 0.2301 | 0.095   | 0.192   | -0.2494 |
| succinate | fumarate          | 0.007   | 0.016   | 0.2380 | 0.882   | 0.940   | -0.0224 |
| succinate | lysine            | 0.002   | 0.005   | 0.2703 | < 0.001 | < 0.001 | 0.8437  |
| succinate | methionine        | 0.094   | 0.145   | 0.1479 | < 0.001 | < 0.001 | -0.5143 |
| succinate | unk1              | 0.001   | 0.003   | 0.2822 | 0.209   | 0.350   | 0.1886  |
| succinate | unk2              | < 0.001 | < 0.001 | 0.3916 | 0.663   | 0.788   | 0.0659  |
| succinate | unk3              | < 0.001 | < 0.001 | 0.3527 | 0.007   | 0.025   | 0.3927  |
| succinate | 3-hydroxybutyrate | 0.011   | 0.023   | 0.2227 | < 0.001 | < 0.001 | 0.6073  |
| succinate | 2-hydroxybutyrate | 0.001   | 0.003   | 0.2775 | 0.852   | 0.921   | 0.0283  |
| succinate | proline           | 0.001   | 0.003   | 0.2894 | < 0.001 | < 0.001 | 0.9766  |
| fumarate  | pyruvate          | 0.010   | 0.021   | 0.2273 | 0.058   | 0.133   | 0.2817  |
| fumarate  | glutamine         | 0.063   | 0.105   | 0.1643 | 0.004   | 0.016   | 0.4192  |
| fumarate  | citrate           | 0.014   | 0.029   | 0.2168 | 0.012   | 0.039   | 0.3689  |
| fumarate  | glycine           | 0.001   | 0.003   | 0.2776 | 0.217   | 0.357   | 0.1856  |
| fumarate  | lactate           | 0.006   | 0.014   | 0.2421 | 0.016   | 0.049   | 0.3545  |
| fumarate  | mannose           | 0.002   | 0.005   | 0.2751 | 0.546   | 0.696   | 0.0914  |
| fumarate  | threonine         | 0.018   | 0.036   | 0.2086 | 0.663   | 0.788   | 0.0659  |
| fumarate  | unk2              | 0.009   | 0.019   | 0.2282 | 0.108   | 0.214   | 0.2401  |
| fumarate  | succinate         | 0.007   | 0.016   | 0.2380 | 0.882   | 0.940   | -0.0224 |

**Supplementary Table 2. Multivariate statistical analysis of correlations between formate and other metabolites (DS, n=129; CTRL, n=46).**

The table contains the statistically significant correlations (in DS and/or CTRL group) between metabolites analyzed with 1H-NMR from plasma samples. We reported p-value of the univariate Wilcoxon test, p-value after FDR correction and r for each metabolite. Correlations with significant p-value after FDR correction (<0.01) are highlighted in red. Pairs with moderate correlation (0.4< r <0.7) are highlighted in green and pairs with strong correlation (r >0.7) are highlighted in blue.

| Metabolite 1 | Metabolite 2      | DS Metabolites |                              |        | CTRL Metabolites |                              |         |
|--------------|-------------------|----------------|------------------------------|--------|------------------|------------------------------|---------|
|              |                   | P-value        | P-value after FDR correction | r      | P-value          | P-value after FDR correction | r       |
| formate      | acetate           | < 0.001        | < 0.001                      | 0.6349 | < 0.001          | < 0.001                      | 0.7798  |
| formate      | acetone           | 0.183          | 0.248                        | 0.1180 | 0.001            | 0.005                        | 0.4690  |
| formate      | citrate           | 0.029          | 0.054                        | 0.1918 | 0.002            | 0.009                        | 0.4429  |
| formate      | glycine           | 0.006          | 0.014                        | 0.2394 | 0.064            | 0.142                        | 0.2753  |
| formate      | lysine            | 0.018          | 0.036                        | 0.2078 | 0.403            | 0.556                        | -0.1262 |
| formate      | acetatoacetate    | 0.069          | 0.113                        | 0.1607 | 0.001            | 0.005                        | 0.4665  |
| formate      | methionine        | 0.608          | 0.688                        | 0.0456 | 0.005            | 0.019                        | 0.4092  |
| formate      | unk1              | 0.005          | 0.012                        | 0.2436 | 0.016            | 0.049                        | 0.3532  |
| formate      | unk3              | < 0.001        | < 0.001                      | 0.4300 | 0.037            | 0.094                        | 0.3086  |
| formate      | succinate         | 0.009          | 0.019                        | 0.2301 | 0.095            | 0.192                        | -0.2494 |
| formate      | 2-hydroxybutyrate | 0.028          | 0.052                        | 0.1933 | < 0.001          | < 0.001                      | 0.4968  |



**Supplementary Table 3. Multivariate statistical analysis of correlations between ketone bodies and other metabolites (DS, n=129; CTRL, n=46).**

The table contains the statistically significant correlations (in DS and/or CTRL group) between metabolites analyzed with 1H-NMR from plasma samples. We reported p-value of the univariate Wilcoxon test, p-value after FDR correction and r for each metabolite. Correlations with significant p-value after FDR correction (<0.01) are highlighted in red. Pairs with moderate correlation (0.4 < r < 0.7) are highlighted in green and pairs with strong correlation (r > 0.7) are highlighted in blue.

| Metabolite 1      | Metabolite 2      | DS Metabolites |                              |         | CTRL Metabolites |                              |         |
|-------------------|-------------------|----------------|------------------------------|---------|------------------|------------------------------|---------|
|                   |                   | P-value        | P-value after FDR correction | r       | P-value          | P-value after FDR correction | r       |
| 2-hydroxybutyrate | leucine           | < 0.001        | < 0.001                      | 0.3882  | 0.064            | 0.142                        | 0.2751  |
| 2-hydroxybutyrate | valine            | < 0.001        | < 0.001                      | 0.3193  | 0.251            | 0.394                        | 0.1728  |
| 2-hydroxybutyrate | alanine           | 0.670          | 0.738                        | -0.0378 | 0.007            | 0.025                        | -0.3894 |
| 2-hydroxybutyrate | acetate           | 0.020          | 0.039                        | 0.2047  | 0.004            | 0.016                        | 0.4209  |
| 2-hydroxybutyrate | pyruvate          | < 0.001        | < 0.001                      | 0.3687  | 0.572            | 0.713                        | 0.0854  |
| 2-hydroxybutyrate | acetone           | < 0.001        | < 0.001                      | 0.4966  | < 0.001          | < 0.001                      | 0.7761  |
| 2-hydroxybutyrate | glutamine         | < 0.001        | < 0.001                      | 0.3273  | 0.963            | 0.986                        | -0.0070 |
| 2-hydroxybutyrate | citrate           | < 0.001        | < 0.001                      | 0.4666  | 0.001            | 0.005                        | 0.4586  |
| 2-hydroxybutyrate | glycine           | 0.002          | 0.005                        | 0.2674  | 0.897            | 0.950                        | 0.0197  |
| 2-hydroxybutyrate | creatine          | < 0.001        | < 0.001                      | 0.5004  | 0.045            | 0.108                        | 0.2975  |
| 2-hydroxybutyrate | creatinine        | 0.001          | 0.003                        | 0.3008  | 0.909            | 0.958                        | -0.0174 |
| 2-hydroxybutyrate | glucose           | < 0.001        | < 0.001                      | 0.3610  | 0.549            | 0.697                        | 0.0908  |
| 2-hydroxybutyrate | mannose           | 0.002          | 0.005                        | 0.2742  | 0.522            | 0.676                        | 0.0968  |
| 2-hydroxybutyrate | formate           | 0.028          | 0.052                        | 0.1933  | < 0.001          | < 0.001                      | 0.4968  |
| 2-hydroxybutyrate | lysine            | < 0.001        | < 0.001                      | 0.5244  | 0.346            | 0.507                        | 0.1422  |
| 2-hydroxybutyrate | acetatoacetate    | < 0.001        | < 0.001                      | 0.6031  | < 0.001          | < 0.001                      | 0.7921  |
| 2-hydroxybutyrate | methionine        | < 0.001        | < 0.001                      | 0.4144  | 0.292            | 0.448                        | 0.1589  |
| 2-hydroxybutyrate | unk1              | < 0.001        | < 0.001                      | 0.4077  | < 0.001          | < 0.001                      | 0.5206  |
| 2-hydroxybutyrate | unk3              | < 0.001        | < 0.001                      | 0.3528  | 0.055            | 0.127                        | 0.2845  |
| 2-hydroxybutyrate | 3-hydroxybutyrate | < 0.001        | < 0.001                      | 0.5532  | < 0.001          | < 0.001                      | 0.6708  |
| 2-hydroxybutyrate | succinate         | 0.001          | 0.003                        | 0.2775  | 0.852            | 0.921                        | 0.0283  |
| 2-hydroxybutyrate | proline           | 0.001          | 0.003                        | 0.2844  | 0.371            | 0.532                        | 0.1351  |
| 3-hydroxybutyrate | leucine           | 0.021          | 0.041                        | 0.2027  | 0.010            | 0.034                        | 0.3769  |
| 3-hydroxybutyrate | isoleucine        | 0.997          | 0.997                        | 0.0003  | 0.002            | 0.009                        | 0.4504  |
| 3-hydroxybutyrate | alanine           | 0.022          | 0.042                        | -0.2019 | < 0.001          | < 0.001                      | -0.5827 |
| 3-hydroxybutyrate | acetate           | 0.009          | 0.019                        | 0.2291  | 0.816            | 0.887                        | 0.0353  |
| 3-hydroxybutyrate | pyruvate          | 0.007          | 0.016                        | 0.2347  | 0.170            | 0.295                        | -0.2060 |
| 3-hydroxybutyrate | acetone           | < 0.001        | < 0.001                      | 0.8244  | < 0.001          | < 0.001                      | 0.6605  |
| 3-hydroxybutyrate | citrate           | < 0.001        | < 0.001                      | 0.3366  | 0.770            | 0.859                        | 0.0443  |
| 3-hydroxybutyrate | creatine          | 0.003          | 0.008                        | 0.2589  | < 0.001          | < 0.001                      | 0.5849  |
| 3-hydroxybutyrate | creatinine        | 0.015          | 0.031                        | 0.2137  | 0.338            | 0.499                        | -0.1445 |
| 3-hydroxybutyrate | tyrosine          | 0.203          | 0.267                        | -0.1129 | 0.001            | 0.005                        | -0.4644 |
| 3-hydroxybutyrate | lysine            | 0.003          | 0.008                        | 0.2628  | < 0.001          | < 0.001                      | 0.5895  |
| 3-hydroxybutyrate | acetatoacetate    | < 0.001        | < 0.001                      | 0.8765  | < 0.001          | < 0.001                      | 0.7065  |
| 3-hydroxybutyrate | unk1              | 0.002          | 0.005                        | 0.2715  | 0.001            | 0.005                        | 0.4711  |
| 3-hydroxybutyrate | unk3              | 0.071          | 0.115                        | 0.1595  | 0.006            | 0.022                        | 0.3957  |
| 3-hydroxybutyrate | succinate         | 0.011          | 0.023                        | 0.2227  | < 0.001          | < 0.001                      | 0.6073  |
| 3-hydroxybutyrate | 2-hydroxybutyrate | < 0.001        | < 0.001                      | 0.5532  | < 0.001          | < 0.001                      | 0.6708  |
| 3-hydroxybutyrate | proline           | < 0.001        | < 0.001                      | 0.5540  | < 0.001          | < 0.001                      | 0.7047  |
| acetate           | leucine           | < 0.001        | < 0.001                      | 0.3023  | 0.885            | 0.940                        | -0.0220 |
| acetate           | valine            | < 0.001        | < 0.001                      | 0.3203  | 0.192            | 0.329                        | 0.1958  |
| acetate           | glutamine         | < 0.001        | < 0.001                      | 0.3691  | 0.396            | 0.554                        | 0.1283  |
| acetate           | citrate           | 0.006          | 0.014                        | 0.2409  | 0.001            | 0.005                        | 0.4919  |
| acetate           | creatinine        | 0.003          | 0.008                        | 0.2630  | 0.914            | 0.958                        | -0.0164 |
| acetate           | glucose           | < 0.001        | < 0.001                      | 0.3288  | 0.041            | 0.102                        | 0.3029  |
| acetate           | tyrosine          | 0.012          | 0.025                        | 0.2200  | 0.805            | 0.880                        | 0.0374  |
| acetate           | histidine         | 0.004          | 0.010                        | 0.2520  | 0.425            | 0.581                        | 0.121   |
| acetate           | formate           | < 0.001        | < 0.001                      | 0.6349  | < 0.001          | < 0.001                      | 0.7798  |
| acetate           | threonine         | 0.013          | 0.027                        | 0.2181  | 0.211            | 0.350                        | -0.1880 |
| acetate           | lysine            | < 0.001        | < 0.001                      | 0.3228  | 0.081            | 0.171                        | -0.260  |
| acetate           | acetatoacetate    | 0.009          | 0.019                        | 0.2308  | 0.017            | 0.051                        | 0.3511  |
| acetate           | methionine        | 0.656          | 0.730                        | 0.0396  | 0.010            | 0.034                        | 0.376   |
| acetate           | unk1              | 0.004          | 0.010                        | 0.2551  | 0.016            | 0.049                        | 0.3531  |
| acetate           | unk3              | < 0.001        | < 0.001                      | 0.3914  | 0.678            | 0.798                        | -0.0629 |
| acetate           | 3-hydroxybutyrate | 0.009          | 0.019                        | 0.2291  | 0.816            | 0.887                        | 0.0353  |
| acetate           | succinate         | 0.005          | 0.012                        | 0.2456  | 0.041            | 0.102                        | -0.3023 |
| acetate           | 2-hydroxybutyrate | 0.020          | 0.039                        | 0.2047  | 0.004            | 0.016                        | 0.4209  |
| acetate           | proline           | < 0.001        | < 0.001                      | 0.3043  | 0.093            | 0.189                        | -0.2503 |
| acetone           | alanine           | < 0.001        | < 0.001                      | -0.3213 | 0.086            | 0.179                        | -0.2561 |
| acetone           | pyruvate          | < 0.001        | < 0.001                      | 0.3086  | 0.167            | 0.291                        | 0.2074  |
| acetone           | citrate           | < 0.001        | < 0.001                      | 0.3131  | 0.033            | 0.085                        | 0.3149  |
| acetone           | tyrosine          | 0.023          | 0.044                        | -0.1997 | 0.114            | 0.224                        | -0.2364 |

|                |                   |         |         |         |         |         |         |
|----------------|-------------------|---------|---------|---------|---------|---------|---------|
| acetone        | formate           | 0.183   | 0.248   | 0.1180  | 0.001   | 0.005   | 0.4690  |
| acetone        | acetatoacetate    | < 0.001 | < 0.001 | 0.8999  | < 0.001 | < 0.001 | 0.9664  |
| acetone        | unk1              | 0.003   | 0.008   | 0.2616  | 0.009   | 0.031   | 0.3828  |
| acetone        | 3-hydroxybutyrate | < 0.001 | < 0.001 | 0.8244  | < 0.001 | < 0.001 | 0.6605  |
| acetone        | 2-hydroxybutyrate | < 0.001 | < 0.001 | 0.4966  | < 0.001 | < 0.001 | 0.7761  |
| acetone        | proline           | < 0.001 | < 0.001 | 0.4827  | 0.933   | 0.966   | -0.0127 |
| acetatoacetate | alanine           | < 0.001 | < 0.001 | -0.3134 | 0.027   | 0.075   | -0.3260 |
| acetatoacetate | acetate           | 0.009   | 0.019   | 0.2308  | 0.017   | 0.051   | 0.3511  |
| acetatoacetate | acetone           | < 0.001 | < 0.001 | 0.8999  | < 0.001 | < 0.001 | 0.9664  |
| acetatoacetate | citrate           | < 0.001 | < 0.001 | 0.3206  | 0.050   | 0.119   | 0.2905  |
| acetatoacetate | phenylalanine     | 0.023   | 0.044   | -0.1996 | 0.033   | 0.085   | -0.3141 |
| acetatoacetate | methionine        | 0.012   | 0.025   | 0.2217  | 0.193   | 0.329   | 0.1955  |
| acetatoacetate | unk1              | 0.002   | 0.005   | 0.2698  | 0.009   | 0.031   | 0.3790  |
| acetatoacetate | 3-hydroxybutyrate | < 0.001 | < 0.001 | 0.8765  | < 0.001 | < 0.001 | 0.7065  |
| acetatoacetate | 2-hydroxybutyrate | < 0.001 | < 0.001 | 0.6031  | < 0.001 | < 0.001 | 0.7921  |
| acetatoacetate | proline           | < 0.001 | < 0.001 | 0.5202  | 0.680   | 0.798   | 0.0624  |

**Supplementary Table 4. Multivariate statistical analysis of correlations between lactate, glucose, mannose and other metabolites (DS, n=129; CTRL, n=46).** The table contains the statistically significant correlations (in DS and/or CTRL group) between metabolites analyzed with 1H-NMR from plasma samples. We reported p-value of the univariate Wilcoxon test, p-value after FDR correction and r for each metabolite. Correlations with significant p-value after FDR correction (<0.01) are highlighted in red. Pairs with moderate correlation (0.4< r <0.7) are highlighted in green and pairs with strong correlation (r >0.7) are highlighted in blue.

| Metabolite 1 | Metabolite 2      | DS Metabolites |                              |         | CTRL Metabolites |                              |         |
|--------------|-------------------|----------------|------------------------------|---------|------------------|------------------------------|---------|
|              |                   | P-value        | P-value after FDR correction | r       | P-value          | P-value after FDR correction | r       |
| lactate      | valine            | 0.240          | 0.309                        | 0.1041  | 0.001            | 0.005                        | 0.4633  |
| lactate      | alanine           | 0.001          | 0.003                        | 0.2794  | < 0.001          | < 0.001                      | 0.5742  |
| lactate      | pyruvate          | < 0.001        | < 0.001                      | 0.5644  | < 0.001          | < 0.001                      | 0.6894  |
| lactate      | glutamine         | 0.598          | 0.678                        | -0.0469 | 0.001            | 0.005                        | 0.4553  |
| lactate      | citrate           | 0.539          | 0.625                        | 0.0546  | < 0.001          | < 0.001                      | 0.6602  |
| lactate      | glycine           | 0.437          | 0.524                        | 0.0690  | < 0.001          | < 0.001                      | 0.5434  |
| lactate      | glucose           | 0.491          | 0.578                        | 0.0611  | < 0.001          | < 0.001                      | 0.5955  |
| lactate      | tyrosine          | 0.237          | 0.306                        | -0.1048 | 0.004            | 0.016                        | 0.4178  |
| lactate      | histidine         | 0.530          | 0.618                        | 0.0558  | < 0.001          | < 0.001                      | 0.5307  |
| lactate      | fumarate          | 0.006          | 0.014                        | 0.2421  | 0.016            | 0.049                        | 0.3545  |
| lactate      | methionine        | 0.848          | 0.892                        | 0.0171  | < 0.001          | < 0.001                      | 0.5570  |
| lactate      | unk2              | < 0.001        | < 0.001                      | 0.9157  | < 0.001          | < 0.001                      | 0.6706  |
| lactate      | succinate         | < 0.001        | < 0.001                      | 0.4360  | 0.002            | 0.009                        | -0.4375 |
| lactate      | proline           | 0.001          | 0.003                        | 0.2871  | 0.007            | 0.025                        | -0.3939 |
| glucose      | leucine           | < 0.001        | < 0.001                      | 0.4602  | 0.861            | 0.927                        | 0.0266  |
| glucose      | isoleucine        | 0.009          | 0.019                        | 0.2278  | 0.065            | 0.143                        | -0.2748 |
| glucose      | valine            | < 0.001        | < 0.001                      | 0.4779  | < 0.001          | < 0.001                      | 0.5285  |
| glucose      | alanine           | < 0.001        | < 0.001                      | 0.3946  | < 0.001          | < 0.001                      | 0.6576  |
| glucose      | acetate           | < 0.001        | < 0.001                      | 0.3288  | 0.041            | 0.102                        | 0.3029  |
| glucose      | pyruvate          | 0.651          | 0.728                        | 0.0402  | < 0.001          | < 0.001                      | 0.6335  |
| glucose      | glutamine         | < 0.001        | < 0.001                      | 0.6416  | < 0.001          | < 0.001                      | 0.6545  |
| glucose      | citrate           | < 0.001        | < 0.001                      | 0.3420  | < 0.001          | < 0.001                      | 0.6215  |
| glucose      | glycine           | < 0.001        | < 0.001                      | 0.5412  | < 0.001          | < 0.001                      | 0.7217  |
| glucose      | creatine          | < 0.001        | < 0.001                      | 0.3891  | 0.020            | 0.058                        | -0.3427 |
| glucose      | creatinine        | < 0.001        | < 0.001                      | 0.3862  | < 0.001          | < 0.001                      | 0.5158  |
| glucose      | lactate           | 0.491          | 0.578                        | 0.0611  | < 0.001          | < 0.001                      | 0.5955  |
| glucose      | mannose           | < 0.001        | < 0.001                      | 0.4064  | 0.003            | 0.013                        | 0.4342  |
| glucose      | tyrosine          | < 0.001        | < 0.001                      | 0.3153  | 0.001            | 0.005                        | 0.4614  |
| glucose      | histidine         | < 0.001        | < 0.001                      | 0.3812  | < 0.001          | < 0.001                      | 0.6141  |
| glucose      | phenylalanine     | 0.004          | 0.010                        | 0.2539  | 0.991            | 0.996                        | 0.0017  |
| glucose      | lysine            | < 0.001        | < 0.001                      | 0.6239  | 0.069            | 0.150                        | -0.2706 |
| glucose      | methionine        | < 0.001        | < 0.001                      | 0.3232  | < 0.001          | < 0.001                      | 0.6628  |
| glucose      | unk1              | < 0.001        | < 0.001                      | 0.3245  | 0.672            | 0.795                        | -0.0642 |
| glucose      | unk3              | < 0.001        | < 0.001                      | 0.3429  | 0.576            | 0.715                        | 0.0846  |
| glucose      | succinate         | 0.001          | 0.003                        | 0.2884  | < 0.001          | < 0.001                      | -0.5852 |
| glucose      | 2-hydroxybutyrate | < 0.001        | < 0.001                      | 0.3610  | 0.549            | 0.697                        | 0.0908  |
| glucose      | proline           | < 0.001        | < 0.001                      | 0.3076  | < 0.001          | < 0.001                      | -0.6027 |
| mannose      | leucine           | < 0.001        | < 0.001                      | 0.3738  | 0.636            | 0.766                        | -0.0716 |
| mannose      | isoleucine        | 0.001          | 0.003                        | 0.2774  | 0.031            | 0.083                        | -0.3193 |
| mannose      | valine            | < 0.001        | < 0.001                      | 0.4010  | 0.160            | 0.284                        | 0.2109  |
| mannose      | pyruvate          | 0.904          | 0.932                        | 0.0108  | 0.005            | 0.019                        | 0.4031  |
| mannose      | glutamine         | 0.004          | 0.010                        | 0.2526  | 0.084            | 0.177                        | 0.2571  |
| mannose      | creatine          | 0.012          | 0.025                        | 0.2219  | 0.243            | 0.387                        | -0.1755 |
| mannose      | creatinine        | 0.025          | 0.047                        | 0.1977  | 0.119            | 0.232                        | 0.2333  |
| mannose      | glucose           | < 0.001        | < 0.001                      | 0.4064  | 0.003            | 0.013                        | 0.4342  |
| mannose      | tyrosine          | 0.005          | 0.012                        | 0.2482  | 0.008            | 0.028                        | 0.3888  |
| mannose      | fumarate          | 0.002          | 0.005                        | 0.2751  | 0.546            | 0.696                        | 0.0914  |
| mannose      | threonine         | 0.006          | 0.014                        | 0.2422  | 0.085            | 0.178                        | 0.2568  |
| mannose      | lysine            | < 0.001        | < 0.001                      | 0.4136  | 0.333            | 0.493                        | -0.1459 |
| mannose      | methionine        | 0.014          | 0.029                        | 0.2158  | 0.075            | 0.161                        | 0.2647  |
| mannose      | unk1              | 0.003          | 0.008                        | 0.2607  | 0.450            | 0.608                        | -0.1140 |
| mannose      | unk3              | 0.001          | 0.003                        | 0.2951  | 0.320            | 0.483                        | 0.1499  |
| mannose      | succinate         | 0.077          | 0.122                        | 0.1562  | 0.015            | 0.048                        | -0.3574 |
| mannose      | 2-hydroxybutyrate | 0.002          | 0.005                        | 0.2742  | 0.522            | 0.676                        | 0.0968  |
| mannose      | proline           | 0.253          | 0.323                        | 0.1015  | 0.012            | 0.039                        | -0.3667 |

**Supplementary Table 5. Multivariate statistical analysis of correlation between branched-chain amino acids (BCAA) and other metabolites (DS, n=129; CTRL, n=46).** The table contains the statistically significant correlations (in DS and/or CTRL group) between metabolites analyzed with 1H-NMR from plasma samples. We reported p-value of the univariate Wilcoxon test, p-value after FDR correction and r for each metabolite. Correlations with significant p-value after FDR correction (<0.01) are highlighted in red. Pairs with moderate correlation (0.4< r <0.7) are highlighted in green and pairs with strong correlation (r >0.7) are highlighted in blue.

| Metabolite 1 | Metabolite 2      | DS Metabolites |                              |        | CTRL Metabolites |                              |         |
|--------------|-------------------|----------------|------------------------------|--------|------------------|------------------------------|---------|
|              |                   | P-value        | P-value after FDR correction | r      | P-value          | P-value after FDR correction | r       |
| leucine      | isoleucine        | < 0.001        | < 0.001                      | 0.8265 | < 0.001          | < 0.001                      | 0.8496  |
| leucine      | valine            | < 0.001        | < 0.001                      | 0.9352 | < 0.001          | < 0.001                      | 0.6086  |
| leucine      | alanine           | 0.001          | 0.003                        | 0.2855 | 0.883            | 0.940                        | 0.0222  |
| leucine      | acetate           | < 0.001        | < 0.001                      | 0.3023 | 0.885            | 0.940                        | -0.0220 |
| leucine      | pyruvate          | < 0.001        | < 0.001                      | 0.3135 | 0.361            | 0.523                        | 0.1379  |
| leucine      | glutamine         | < 0.001        | < 0.001                      | 0.5966 | 0.005            | 0.019                        | 0.4079  |
| leucine      | citrate           | < 0.001        | < 0.001                      | 0.3179 | 0.391            | 0.553                        | 0.1296  |
| leucine      | glycine           | 0.001          | 0.003                        | 0.3017 | 0.323            | 0.484                        | 0.1490  |
| leucine      | creatine          | < 0.001        | < 0.001                      | 0.4035 | 0.024            | 0.068                        | 0.3332  |
| leucine      | creatinine        | < 0.001        | < 0.001                      | 0.5598 | 0.001            | 0.005                        | 0.4872  |
| leucine      | glucose           | < 0.001        | < 0.001                      | 0.4602 | 0.861            | 0.927                        | 0.0266  |
| leucine      | mannose           | < 0.001        | < 0.001                      | 0.3738 | 0.636            | 0.766                        | -0.0716 |
| leucine      | tyrosine          | 0.001          | 0.003                        | 0.2819 | 0.029            | 0.079                        | 0.3225  |
| leucine      | histidine         | < 0.001        | < 0.001                      | 0.4725 | 0.048            | 0.114                        | 0.2930  |
| leucine      | phenylalanine     | < 0.001        | < 0.001                      | 0.4165 | 0.126            | 0.240                        | 0.2286  |
| leucine      | lysine            | < 0.001        | < 0.001                      | 0.8479 | < 0.001          | < 0.001                      | 0.6494  |
| leucine      | methionine        | < 0.001        | < 0.001                      | 0.3528 | 0.127            | 0.240                        | 0.2280  |
| leucine      | unk1              | < 0.001        | < 0.001                      | 0.5247 | 0.012            | 0.039                        | 0.3657  |
| leucine      | unk3              | < 0.001        | < 0.001                      | 0.3116 | 0.010            | 0.034                        | 0.3778  |
| leucine      | 3-hydroxybutyrate | 0.021          | 0.041                        | 0.2027 | 0.010            | 0.034                        | 0.3769  |
| leucine      | succinate         | 0.007          | 0.016                        | 0.2362 | 0.055            | 0.127                        | 0.2850  |
| leucine      | 2-hydroxybutyrate | < 0.001        | < 0.001                      | 0.3882 | 0.064            | 0.142                        | 0.2751  |
| leucine      | proline           | < 0.001        | < 0.001                      | 0.3078 | 0.032            | 0.085                        | 0.3170  |
| isoleucine   | leucine           | < 0.001        | < 0.001                      | 0.8265 | < 0.001          | < 0.001                      | 0.8496  |
| isoleucine   | valine            | < 0.001        | < 0.001                      | 0.7966 | 0.048            | 0.114                        | 0.2931  |
| isoleucine   | alanine           | 0.002          | 0.005                        | 0.2683 | 0.403            | 0.556                        | -0.1264 |
| isoleucine   | glutamine         | < 0.001        | < 0.001                      | 0.4218 | 0.116            | 0.227                        | 0.2352  |
| isoleucine   | creatine          | 0.024          | 0.046                        | 0.1983 | 0.003            | 0.013                        | 0.4351  |
| isoleucine   | creatinine        | < 0.001        | < 0.001                      | 0.4235 | 0.064            | 0.142                        | 0.2756  |
| isoleucine   | glucose           | 0.009          | 0.019                        | 0.2278 | 0.065            | 0.143                        | -0.2748 |
| isoleucine   | mannose           | 0.001          | 0.003                        | 0.2774 | 0.031            | 0.083                        | -0.3193 |
| isoleucine   | tyrosine          | 0.002          | 0.005                        | 0.2718 | 0.461            | 0.616                        | 0.1114  |
| isoleucine   | histidine         | < 0.001        | < 0.001                      | 0.4102 | 0.458            | 0.614                        | 0.1121  |
| isoleucine   | phenylalanine     | < 0.001        | < 0.001                      | 0.4122 | 0.033            | 0.085                        | 0.3158  |
| isoleucine   | threonine         | 0.011          | 0.023                        | 0.2223 | 0.470            | 0.624                        | -0.1091 |
| isoleucine   | lysine            | < 0.001        | < 0.001                      | 0.6307 | < 0.001          | < 0.001                      | 0.7636  |
| isoleucine   | unk1              | < 0.001        | < 0.001                      | 0.3612 | 0.057            | 0.131                        | 0.2831  |
| isoleucine   | unk3              | 0.367          | 0.449                        | 0.0802 | 0.011            | 0.037                        | 0.3720  |
| isoleucine   | 3-hydroxybutyrate | 0.997          | 0.997                        | 0.0003 | 0.002            | 0.009                        | 0.4504  |
| isoleucine   | succinate         | 0.234          | 0.303                        | 0.1056 | < 0.001          | < 0.001                      | 0.5689  |
| isoleucine   | proline           | 0.033          | 0.060                        | 0.1878 | < 0.001          | < 0.001                      | 0.5774  |
| valine       | leucine           | < 0.001        | < 0.001                      | 0.9352 | < 0.001          | < 0.001                      | 0.6086  |
| valine       | isoleucine        | < 0.001        | < 0.001                      | 0.7966 | 0.048            | 0.114                        | 0.2931  |
| valine       | alanine           | < 0.001        | < 0.001                      | 0.3205 | 0.001            | 0.005                        | 0.4785  |
| valine       | acetate           | < 0.001        | < 0.001                      | 0.3203 | 0.192            | 0.329                        | -0.1958 |
| valine       | pyruvate          | 0.001          | 0.003                        | 0.2831 | < 0.001          | < 0.001                      | 0.5755  |
| valine       | glutamine         | < 0.001        | < 0.001                      | 0.5358 | 0.004            | 0.016                        | 0.4156  |
| valine       | citrate           | 0.006          | 0.014                        | 0.2405 | 0.001            | 0.005                        | 0.4788  |
| valine       | glycine           | 0.003          | 0.008                        | 0.2602 | < 0.001          | < 0.001                      | 0.5527  |
| valine       | creatine          | < 0.001        | < 0.001                      | 0.3831 | 0.110            | 0.217                        | -0.2385 |
| valine       | creatinine        | < 0.001        | < 0.001                      | 0.5087 | < 0.001          | < 0.001                      | 0.5841  |
| valine       | lactate           | 0.240          | 0.309                        | 0.1041 | 0.001            | 0.005                        | 0.4633  |
| valine       | glucose           | < 0.001        | < 0.001                      | 0.4779 | < 0.001          | < 0.001                      | 0.5285  |
| valine       | mannose           | < 0.001        | < 0.001                      | 0.4010 | 0.160            | 0.284                        | 0.2109  |
| valine       | tyrosine          | 0.001          | 0.003                        | 0.2821 | < 0.001          | < 0.001                      | 0.5451  |
| valine       | histidine         | < 0.001        | < 0.001                      | 0.4340 | < 0.001          | < 0.001                      | 0.6037  |
| valine       | phenylalanine     | < 0.001        | < 0.001                      | 0.4315 | 0.729            | 0.837                        | -0.0525 |
| valine       | threonine         | 0.025          | 0.047                        | 0.1977 | 0.086            | 0.179                        | 0.2561  |
| valine       | lysine            | < 0.001        | < 0.001                      | 0.8100 | 0.595            | 0.728                        | -0.0805 |
| valine       | methionine        | < 0.001        | < 0.001                      | 0.3413 | < 0.001          | < 0.001                      | 0.6102  |
| valine       | unk1              | < 0.001        | < 0.001                      | 0.5668 | 0.127            | 0.240                        | 0.2286  |
| valine       | unk3              | 0.003          | 0.008                        | 0.2588 | 0.806            | 0.880                        | 0.0372  |

|        |                   |         |         |        |         |         |         |
|--------|-------------------|---------|---------|--------|---------|---------|---------|
| valine | succinate         | 0.001   | 0.003   | 0.2770 | < 0.001 | < 0.001 | -0.5128 |
| valine | 2-hydroxybutyrate | < 0.001 | < 0.001 | 0.3193 | 0.251   | 0.394   | 0.1728  |
| valine | proline           | < 0.001 | 0.003   | 0.2879 | 0.001   | 0.005   | -0.4883 |

**Supplementary Table 6. Multivariate statistical analysis of correlation between creatine-creatinine and other metabolites (DS, n=129; CTRL, n=46).** The table contains the statistically significant correlations (in DS and/or CTRL group) between metabolites analyzed with 1H-NMR from plasma samples. We reported p-value of the univariate Wilcoxon test, p-value after FDR correction and r for each metabolite. Correlations with significant p-value after FDR correction (<0.01) are highlighted in red. Pairs with moderate correlation (0.4< r <0.7) are highlighted in green and pairs with strong correlation (r >0.7) are highlighted in blue.

| Metabolite 1 | Metabolite 2      | DS Metabolites |                              |        | CTRL Metabolites |                              |         |
|--------------|-------------------|----------------|------------------------------|--------|------------------|------------------------------|---------|
|              |                   | P-value        | P-value after FDR correction | r      | P-value          | P-value after FDR correction | r       |
| creatine     | leucine           | < 0.001        | < 0.001                      | 0.4035 | 0.024            | 0.068                        | 0.3332  |
| creatine     | isoleucine        | 0.024          | 0.046                        | 0.1983 | 0.003            | 0.013                        | 0.4351  |
| creatine     | valine            | < 0.001        | < 0.001                      | 0.3831 | 0.110            | 0.217                        | -0.2385 |
| creatine     | alanine           | 0.300          | 0.377                        | 0.0919 | < 0.001          | < 0.001                      | -0.5290 |
| creatine     | pyruvate          | < 0.001        | < 0.001                      | 0.3387 | 0.042            | 0.103                        | -0.3009 |
| creatine     | glutamine         | < 0.001        | < 0.001                      | 0.3426 | 0.636            | 0.766                        | -0.0716 |
| creatine     | citrate           | 0.001          | 0.003                        | 0.2774 | 0.484            | 0.634                        | -0.1059 |
| creatine     | glycine           | < 0.001        | < 0.001                      | 0.4132 | 0.033            | 0.085                        | -0.3149 |
| creatine     | creatinine        | 0.015          | 0.031                        | 0.2141 | 0.053            | 0.124                        | -0.2876 |
| creatine     | glucose           | < 0.001        | < 0.001                      | 0.3891 | 0.020            | 0.058                        | -0.3427 |
| creatine     | mannose           | 0.012          | 0.025                        | 0.2219 | 0.243            | 0.387                        | -0.1755 |
| creatine     | histidine         | < 0.001        | < 0.001                      | 0.3263 | 0.091            | 0.186                        | -0.2522 |
| creatine     | lysine            | < 0.001        | < 0.001                      | 0.5422 | < 0.001          | < 0.001                      | 0.7107  |
| creatine     | methionine        | < 0.001        | < 0.001                      | 0.4404 | 0.054            | 0.126                        | -0.2861 |
| creatine     | unk1              | 0.009          | 0.019                        | 0.2296 | 0.160            | 0.284                        | 0.2104  |
| creatine     | 3-hydroxybutyrate | 0.003          | 0.008                        | 0.2589 | < 0.001          | < 0.001                      | 0.5849  |
| creatine     | succinate         | 0.002          | 0.005                        | 0.2765 | < 0.001          | < 0.001                      | 0.7243  |
| creatine     | 2-hydroxybutyrate | < 0.001        | < 0.001                      | 0.5004 | 0.045            | 0.108                        | 0.2975  |
| creatine     | proline           | 0.064          | 0.106                        | 0.1638 | < 0.001          | < 0.001                      | 0.7311  |
| creatinine   | leucine           | < 0.001        | < 0.001                      | 0.5598 | 0.001            | 0.005                        | 0.4872  |
| creatinine   | isoleucine        | < 0.001        | < 0.001                      | 0.4235 | 0.064            | 0.142                        | 0.2756  |
| creatinine   | valine            | < 0.001        | < 0.001                      | 0.5087 | < 0.001          | < 0.001                      | 0.5841  |
| creatinine   | alanine           | 0.062          | 0.104                        | 0.1646 | 0.004            | 0.016                        | 0.4198  |
| creatinine   | acetate           | 0.003          | 0.008                        | 0.2630 | 0.914            | 0.958                        | -0.0164 |
| creatinine   | pyruvate          | 0.016          | 0.032                        | 0.2122 | < 0.001          | < 0.001                      | 0.4951  |
| creatinine   | glutamine         | < 0.001        | < 0.001                      | 0.5017 | < 0.001          | < 0.001                      | 0.6029  |
| creatinine   | citrate           | < 0.001        | < 0.001                      | 0.3410 | 0.072            | 0.156                        | 0.2673  |
| creatinine   | glycine           | 0.004          | 0.010                        | 0.2549 | < 0.001          | < 0.001                      | 0.5763  |
| creatinine   | creatine          | 0.015          | 0.031                        | 0.2141 | 0.053            | 0.124                        | -0.2876 |
| creatinine   | lactate           | 0.616          | 0.695                        | 0.0446 | 0.029            | 0.079                        | 0.3227  |
| creatinine   | glucose           | < 0.001        | < 0.001                      | 0.3862 | < 0.001          | < 0.001                      | 0.5158  |
| creatinine   | mannose           | 0.025          | 0.047                        | 0.1977 | 0.119            | 0.232                        | 0.2333  |
| creatinine   | tyrosine          | 0.021          | 0.041                        | 0.2030 | 0.004            | 0.016                        | 0.4171  |
| creatinine   | histidine         | < 0.001        | < 0.001                      | 0.4068 | < 0.001          | < 0.001                      | 0.6272  |
| creatinine   | threonine         | 0.110          | 0.163                        | 0.1416 | 0.014            | 0.045                        | 0.3601  |
| creatinine   | lysine            | < 0.001        | < 0.001                      | 0.5762 | 0.394            | 0.554                        | 0.1288  |
| creatinine   | methionine        | < 0.001        | < 0.001                      | 0.3395 | < 0.001          | < 0.001                      | 0.5744  |
| creatinine   | unk1              | 0.004          | 0.010                        | 0.2496 | 0.749            | 0.843                        | 0.0485  |
| creatinine   | 3-hydroxybutyrate | 0.015          | 0.031                        | 0.2137 | 0.338            | 0.499                        | -0.1445 |
| creatinine   | succinate         | 0.017          | 0.034                        | 0.2097 | 0.096            | 0.193                        | -0.2486 |
| creatinine   | 2-hydroxybutyrate | 0.001          | 0.003                        | 0.3008 | 0.909            | 0.958                        | -0.0174 |
| creatinine   | proline           | 0.001          | 0.003                        | 0.2874 | 0.063            | 0.142                        | -0.2764 |

**Supplementary Table 7. Multivariate statistical analysis of correlation between amino acids and other metabolites (DS, n=129; CTRL, n=46).** The table contains the statistically significant correlations (in DS and/or CTRL group) between metabolites analyzed with 1H-NMR from plasma samples. We reported p-value of the univariate Wilcoxon test, p-value after FDR correction and r for each metabolite. Correlations with significant p-value after FDR correction (<0.01) are highlighted in red. Pairs with moderate correlation (0.4< r <0.7) are highlighted in green and pairs with strong correlation (r >0.7) are highlighted in blue.

| Metabolite 1 | Metabolite 2      | DS Metabolites |                              |         | CTRL Metabolites |                              |         |
|--------------|-------------------|----------------|------------------------------|---------|------------------|------------------------------|---------|
|              |                   | P-value        | P-value after FDR correction | r       | P-value          | P-value after FDR correction | r       |
| alanine      | leucine           | 0.001          | 0.003                        | 0.2855  | 0.883            | 0.940                        | 0.0222  |
| alanine      | isoleucine        | 0.002          | 0.005                        | 0.2683  | 0.403            | 0.556                        | -0.1264 |
| alanine      | valine            | < 0.001        | < 0.001                      | 0.3205  | 0.001            | 0.005                        | 0.4785  |
| alanine      | pyruvate          | 0.006          | 0.014                        | 0.2388  | < 0.001          | < 0.001                      | 0.6332  |
| alanine      | acetone           | < 0.001        | < 0.001                      | -0.3213 | 0.086            | 0.179                        | -0.2561 |
| alanine      | glutamine         | < 0.001        | < 0.001                      | 0.4360  | < 0.001          | < 0.001                      | 0.5857  |
| alanine      | citrate           | 0.029          | 0.054                        | 0.1923  | 0.016            | 0.049                        | 0.3527  |
| alanine      | glycine           | < 0.001        | < 0.001                      | 0.4637  | < 0.001          | < 0.001                      | 0.6859  |
| alanine      | creatine          | 0.300          | 0.377                        | 0.0919  | < 0.001          | < 0.001                      | -0.5290 |
| alanine      | creatinine        | 0.062          | 0.104                        | 0.1646  | 0.004            | 0.016                        | 0.4198  |
| alanine      | lactate           | 0.001          | 0.003                        | 0.2794  | < 0.001          | < 0.001                      | 0.5742  |
| alanine      | glucose           | < 0.001        | < 0.001                      | 0.3946  | < 0.001          | < 0.001                      | 0.6576  |
| alanine      | tyrosine          | < 0.001        | < 0.001                      | 0.3150  | < 0.001          | < 0.001                      | 0.6311  |
| alanine      | histidine         | < 0.001        | < 0.001                      | 0.3333  | < 0.001          | < 0.001                      | 0.6254  |
| alanine      | threonine         | 0.052          | 0.089                        | 0.1718  | 0.006            | 0.022                        | 0.3995  |
| alanine      | lysine            | < 0.001        | < 0.001                      | 0.3332  | 0.069            | 0.150                        | -0.2703 |
| alanine      | acetatoacetate    | < 0.001        | < 0.001                      | -0.3134 | 0.027            | 0.075                        | -0.3260 |
| alanine      | methionine        | 0.808          | 0.856                        | -0.0216 | 0.001            | 0.005                        | 0.4721  |
| alanine      | unk2              | 0.008          | 0.018                        | 0.2319  | 0.211            | 0.350                        | 0.1878  |
| alanine      | 3-hydroxybutyrate | 0.022          | 0.042                        | -0.2019 | < 0.001          | < 0.001                      | -0.5827 |
| alanine      | succinate         | 0.040          | 0.071                        | 0.1814  | < 0.001          | < 0.001                      | -0.5245 |
| alanine      | 2-hydroxybutyrate | 0.670          | 0.738                        | -0.0378 | 0.007            | 0.025                        | -0.3894 |
| alanine      | proline           | 0.008          | 0.018                        | 0.2310  | < 0.001          | < 0.001                      | -0.5671 |
| glutamine    | leucine           | < 0.001        | < 0.001                      | 0.5966  | 0.005            | 0.019                        | 0.4079  |
| glutamine    | isoleucine        | < 0.001        | < 0.001                      | 0.4218  | 0.116            | 0.227                        | 0.2352  |
| glutamine    | valine            | < 0.001        | < 0.001                      | 0.5358  | 0.004            | 0.016                        | 0.4156  |
| glutamine    | alanine           | < 0.001        | < 0.001                      | 0.4360  | < 0.001          | < 0.001                      | 0.5857  |
| glutamine    | acetate           | < 0.001        | < 0.001                      | 0.3691  | 0.396            | 0.554                        | 0.1283  |
| glutamine    | pyruvate          | 0.021          | 0.041                        | 0.2030  | 0.001            | 0.005                        | 0.4880  |
| glutamine    | citrate           | < 0.001        | < 0.001                      | 0.4807  | 0.005            | 0.019                        | 0.4052  |
| glutamine    | glycine           | < 0.001        | < 0.001                      | 0.6634  | < 0.001          | < 0.001                      | 0.6924  |
| glutamine    | creatine          | < 0.001        | < 0.001                      | 0.3426  | 0.636            | 0.766                        | -0.0716 |
| glutamine    | creatinine        | < 0.001        | < 0.001                      | 0.5017  | < 0.001          | < 0.001                      | 0.6029  |
| glutamine    | lactate           | 0.598          | 0.678                        | -0.0469 | 0.001            | 0.005                        | 0.4553  |
| glutamine    | glucose           | < 0.001        | < 0.001                      | 0.6416  | < 0.001          | < 0.001                      | 0.6545  |
| glutamine    | mannose           | 0.004          | 0.010                        | 0.2526  | 0.084            | 0.177                        | 0.2571  |
| glutamine    | tyrosine          | < 0.001        | < 0.001                      | 0.4152  | 0.001            | 0.005                        | 0.4859  |
| glutamine    | histidine         | < 0.001        | < 0.001                      | 0.7363  | < 0.001          | < 0.001                      | 0.7056  |
| glutamine    | phenylalanine     | 0.002          | 0.005                        | 0.2729  | 0.030            | 0.081                        | 0.3201  |
| glutamine    | fumarate          | 0.063          | 0.105                        | 0.1643  | 0.004            | 0.016                        | 0.4192  |
| glutamine    | threonine         | 0.001          | 0.003                        | 0.2879  | 0.073            | 0.157                        | 0.2665  |
| glutamine    | lysine            | < 0.001        | < 0.001                      | 0.7336  | 0.039            | 0.099                        | 0.3053  |
| glutamine    | methionine        | 0.001          | 0.003                        | 0.2889  | 0.003            | 0.013                        | 0.4290  |
| glutamine    | unk1              | < 0.001        | < 0.001                      | 0.3382  | 0.225            | 0.365                        | 0.1824  |
| glutamine    | unk3              | < 0.001        | < 0.001                      | 0.3788  | 0.020            | 0.058                        | 0.3422  |
| glutamine    | succinate         | < 0.001        | < 0.001                      | 0.3457  | 0.766            | 0.856                        | -0.0451 |
| glutamine    | 2-hydroxybutyrate | < 0.001        | < 0.001                      | 0.3273  | 0.963            | 0.986                        | -0.0070 |
| glutamine    | proline           | < 0.001        | < 0.001                      | 0.3588  | 0.479            | 0.629                        | -0.1070 |
| glycine      | leucine           | 0.001          | 0.003                        | 0.3017  | 0.323            | 0.484                        | 0.1490  |
| glycine      | valine            | 0.003          | 0.008                        | 0.2602  | < 0.001          | < 0.001                      | 0.5527  |
| glycine      | alanine           | < 0.001        | < 0.001                      | 0.4637  | < 0.001          | < 0.001                      | 0.6859  |
| glycine      | pyruvate          | 0.001          | 0.003                        | 0.2876  | < 0.001          | < 0.001                      | 0.6366  |
| glycine      | glutamine         | < 0.001        | < 0.001                      | 0.6634  | < 0.001          | < 0.001                      | 0.6924  |
| glycine      | citrate           | < 0.001        | < 0.001                      | 0.3514  | 0.005            | 0.019                        | 0.4092  |
| glycine      | creatine          | < 0.001        | < 0.001                      | 0.4132  | 0.033            | 0.085                        | -0.3149 |
| glycine      | creatinine        | 0.004          | 0.010                        | 0.2549  | < 0.001          | < 0.001                      | 0.5763  |
| glycine      | lactate           | 0.437          | 0.524                        | 0.0690  | < 0.001          | < 0.001                      | 0.5434  |
| glycine      | glucose           | < 0.001        | < 0.001                      | 0.5412  | < 0.001          | < 0.001                      | 0.7217  |
| glycine      | tyrosine          | 0.008          | 0.018                        | 0.2332  | < 0.001          | < 0.001                      | 0.5293  |
| glycine      | histidine         | < 0.001        | < 0.001                      | 0.4110  | < 0.001          | < 0.001                      | 0.6698  |
| glycine      | formate           | 0.006          | 0.014                        | 0.2394  | 0.064            | 0.142                        | 0.2753  |
| glycine      | fumarate          | 0.001          | 0.003                        | 0.2776  | 0.217            | 0.357                        | 0.1856  |



|               |                   |         |         |         |         |         |         |
|---------------|-------------------|---------|---------|---------|---------|---------|---------|
| glycine       | threonine         | < 0.001 | < 0.001 | 0.3386  | 0.002   | 0.009   | 0.4436  |
| glycine       | lysine            | < 0.001 | < 0.001 | 0.5458  | 0.584   | 0.722   | -0.0828 |
| glycine       | methionine        | 0.001   | 0.003   | 0.2789  | < 0.001 | < 0.001 | 0.5105  |
| glycine       | unk1              | 0.014   | 0.029   | 0.2151  | 0.529   | 0.681   | 0.0952  |
| glycine       | unk3              | 0.002   | 0.005   | 0.2656  | 0.044   | 0.107   | 0.2979  |
| glycine       | succinate         | < 0.001 | < 0.001 | 0.3963  | 0.005   | 0.019   | -0.4096 |
| glycine       | 2-hydroxybutyrate | 0.002   | 0.005   | 0.2674  | 0.897   | 0.950   | 0.0197  |
| glycine       | proline           | 0.003   | 0.008   | 0.2584  | 0.002   | 0.009   | -0.4534 |
| tyrosine      | leucine           | 0.001   | 0.003   | 0.2819  | 0.029   | 0.079   | 0.3225  |
| tyrosine      | isoleucine        | 0.002   | 0.005   | 0.2718  | 0.461   | 0.616   | 0.1114  |
| tyrosine      | valine            | 0.001   | 0.003   | 0.2821  | < 0.001 | < 0.001 | 0.5451  |
| tyrosine      | alanine           | < 0.001 | < 0.001 | 0.3150  | < 0.001 | < 0.001 | 0.6311  |
| tyrosine      | acetate           | 0.012   | 0.025   | 0.2200  | 0.805   | 0.880   | 0.0374  |
| tyrosine      | pyruvate          | 0.362   | 0.444   | -0.0808 | 0.002   | 0.009   | 0.4370  |
| tyrosine      | acetone           | 0.023   | 0.044   | -0.1997 | 0.114   | 0.224   | -0.2364 |
| tyrosine      | glutamine         | < 0.001 | < 0.001 | 0.4152  | 0.001   | 0.005   | 0.4859  |
| tyrosine      | glycine           | 0.008   | 0.018   | 0.2332  | < 0.001 | < 0.001 | 0.5293  |
| tyrosine      | creatinine        | 0.021   | 0.041   | 0.2030  | 0.004   | 0.016   | 0.4171  |
| tyrosine      | lactate           | 0.237   | 0.306   | -0.1048 | 0.004   | 0.016   | 0.4178  |
| tyrosine      | glucose           | < 0.001 | < 0.001 | 0.3153  | 0.001   | 0.005   | 0.4614  |
| tyrosine      | mannose           | 0.005   | 0.012   | 0.2482  | 0.008   | 0.028   | 0.3888  |
| tyrosine      | histidine         | 0.001   | 0.003   | 0.3010  | < 0.001 | < 0.001 | 0.5507  |
| tyrosine      | threonine         | 0.019   | 0.038   | 0.2065  | 0.016   | 0.049   | 0.3539  |
| tyrosine      | lysine            | < 0.001 | < 0.001 | 0.3631  | 0.972   | 0.991   | 0.0054  |
| tyrosine      | acetatoacetate    | 0.194   | 0.260   | -0.1151 | 0.076   | 0.162   | -0.2646 |
| tyrosine      | methionine        | 0.054   | 0.092   | 0.1701  | 0.010   | 0.034   | 0.3777  |
| tyrosine      | 3-hydroxybutyrate | 0.203   | 0.267   | -0.1129 | 0.001   | 0.005   | -0.4644 |
| tyrosine      | succinate         | 0.799   | 0.849   | 0.0227  | 0.017   | 0.051   | -0.3503 |
| tyrosine      | proline           | 0.075   | 0.119   | 0.1573  | 0.007   | 0.025   | -0.3896 |
| histidine     | leucine           | < 0.001 | < 0.001 | 0.4725  | 0.048   | 0.114   | 0.293   |
| histidine     | isoleucine        | < 0.001 | < 0.001 | 0.4102  | 0.458   | 0.614   | 0.112   |
| histidine     | valine            | < 0.001 | < 0.001 | 0.4340  | < 0.001 | < 0.001 | 0.604   |
| histidine     | alanine           | < 0.001 | < 0.001 | 0.3333  | < 0.001 | < 0.001 | 0.625   |
| histidine     | acetate           | 0.004   | 0.010   | 0.2520  | 0.425   | 0.581   | 0.121   |
| histidine     | pyruvate          | 0.004   | 0.010   | 0.2537  | < 0.001 | < 0.001 | 0.644   |
| histidine     | glutamine         | < 0.001 | < 0.001 | 0.7363  | < 0.001 | < 0.001 | 0.706   |
| histidine     | citrate           | < 0.001 | < 0.001 | 0.4358  | 0.002   | 0.009   | 0.441   |
| histidine     | glycine           | < 0.001 | < 0.001 | 0.4110  | < 0.001 | < 0.001 | 0.670   |
| histidine     | creatine          | < 0.001 | < 0.001 | 0.3263  | 0.091   | 0.186   | -0.252  |
| histidine     | creatinine        | < 0.001 | < 0.001 | 0.4068  | < 0.001 | < 0.001 | 0.627   |
| histidine     | lactate           | 0.530   | 0.618   | 0.0558  | < 0.001 | < 0.001 | 0.531   |
| histidine     | glucose           | < 0.001 | < 0.001 | 0.3812  | < 0.001 | < 0.001 | 0.614   |
| histidine     | tyrosine          | 0.001   | 0.003   | 0.3010  | < 0.001 | < 0.001 | 0.551   |
| histidine     | phenylalanine     | 0.020   | 0.039   | 0.2047  | 0.145   | 0.265   | 0.218   |
| histidine     | lysine            | < 0.001 | < 0.001 | 0.4892  | 0.917   | 0.958   | -0.016  |
| histidine     | methionine        | 0.086   | 0.135   | 0.1516  | 0.002   | 0.009   | 0.437   |
| histidine     | unk1              | 0.004   | 0.010   | 0.2526  | 0.361   | 0.523   | 0.138   |
| histidine     | succinate         | 0.006   | 0.014   | 0.2410  | 0.019   | 0.056   | -0.345  |
| histidine     | proline           | 0.008   | 0.018   | 0.2318  | 0.003   | 0.013   | -0.427  |
| phenylalanine | leucine           | < 0.001 | < 0.001 | 0.4165  | 0.126   | 0.240   | 0.2286  |
| phenylalanine | isoleucine        | < 0.001 | < 0.001 | 0.4122  | 0.033   | 0.085   | 0.3158  |
| phenylalanine | valine            | < 0.001 | < 0.001 | 0.4315  | 0.729   | 0.837   | -0.0525 |
| phenylalanine | glutamine         | 0.002   | 0.005   | 0.2729  | 0.030   | 0.081   | 0.3201  |
| phenylalanine | glucose           | 0.004   | 0.010   | 0.2539  | 0.991   | 0.996   | 0.0017  |
| phenylalanine | histidine         | 0.020   | 0.039   | 0.2047  | 0.145   | 0.265   | 0.2181  |
| phenylalanine | lysine            | < 0.001 | < 0.001 | 0.3381  | 0.012   | 0.039   | 0.3683  |
| phenylalanine | acetatoacetate    | 0.023   | 0.044   | -0.1996 | 0.033   | 0.085   | -0.3141 |
| phenylalanine | unk3              | 0.183   | 0.248   | 0.1179  | 0.001   | 0.005   | 0.4924  |
| threonine     | isoleucine        | 0.011   | 0.023   | 0.2223  | 0.470   | 0.624   | -0.1091 |
| threonine     | valine            | 0.025   | 0.047   | 0.1977  | 0.086   | 0.179   | 0.2561  |
| threonine     | alanine           | 0.052   | 0.089   | 0.1718  | 0.006   | 0.022   | 0.3995  |
| threonine     | acetate           | 0.013   | 0.027   | 0.2181  | 0.211   | 0.350   | -0.1880 |
| threonine     | pyruvate          | 0.866   | 0.901   | 0.0150  | 0.007   | 0.025   | 0.3952  |
| threonine     | glutamine         | 0.001   | 0.003   | 0.2879  | 0.073   | 0.157   | 0.2665  |
| threonine     | glycine           | < 0.001 | < 0.001 | 0.3386  | 0.002   | 0.009   | 0.4436  |
| threonine     | creatinine        | 0.110   | 0.163   | 0.1416  | 0.014   | 0.045   | 0.3601  |
| threonine     | mannose           | 0.006   | 0.014   | 0.2422  | 0.085   | 0.178   | 0.2568  |
| threonine     | tyrosine          | 0.019   | 0.038   | 0.2065  | 0.016   | 0.049   | 0.3539  |
| threonine     | fumarate          | 0.018   | 0.036   | 0.2086  | 0.663   | 0.788   | 0.0659  |
| threonine     | lysine            | 0.004   | 0.010   | 0.2542  | 0.539   | 0.690   | -0.0930 |



|            |                   |         |         |         |         |         |         |
|------------|-------------------|---------|---------|---------|---------|---------|---------|
| threonine  | unk3              | 0.006   | 0.014   | 0.2414  | 0.623   | 0.756   | 0.0744  |
| lysine     | leucine           | < 0.001 | < 0.001 | 0.8479  | < 0.001 | < 0.001 | 0.649   |
| lysine     | isoleucine        | < 0.001 | < 0.001 | 0.6307  | < 0.001 | < 0.001 | 0.764   |
| lysine     | valine            | < 0.001 | < 0.001 | 0.8100  | 0.595   | 0.728   | -0.081  |
| lysine     | alanine           | < 0.001 | < 0.001 | 0.3332  | 0.069   | 0.150   | -0.270  |
| lysine     | acetate           | < 0.001 | < 0.001 | 0.3228  | 0.081   | 0.171   | -0.260  |
| lysine     | pyruvate          | < 0.001 | < 0.001 | 0.3435  | 0.256   | 0.401   | -0.171  |
| lysine     | glutamine         | < 0.001 | < 0.001 | 0.7336  | 0.039   | 0.099   | 0.305   |
| lysine     | citrate           | < 0.001 | < 0.001 | 0.3607  | 0.223   | 0.364   | -0.183  |
| lysine     | glycine           | < 0.001 | < 0.001 | 0.5458  | 0.584   | 0.722   | -0.083  |
| lysine     | creatine          | < 0.001 | < 0.001 | 0.5422  | < 0.001 | < 0.001 | 0.711   |
| lysine     | creatinine        | < 0.001 | < 0.001 | 0.5762  | 0.394   | 0.554   | 0.129   |
| lysine     | glucose           | < 0.001 | < 0.001 | 0.6239  | 0.069   | 0.150   | -0.271  |
| lysine     | mannose           | < 0.001 | < 0.001 | 0.4136  | 0.333   | 0.493   | -0.146  |
| lysine     | tyrosine          | < 0.001 | < 0.001 | 0.3631  | 0.972   | 0.991   | 0.005   |
| lysine     | histidine         | < 0.001 | < 0.001 | 0.4892  | 0.917   | 0.958   | -0.016  |
| lysine     | phenylalanine     | < 0.001 | < 0.001 | 0.3381  | 0.012   | 0.039   | 0.368   |
| lysine     | formate           | 0.018   | 0.036   | 0.2078  | 0.403   | 0.556   | -0.126  |
| lysine     | threonine         | 0.004   | 0.010   | 0.2542  | 0.539   | 0.690   | -0.093  |
| lysine     | methionine        | < 0.001 | < 0.001 | 0.4765  | 0.139   | 0.256   | -0.221  |
| lysine     | unk1              | < 0.001 | < 0.001 | 0.4463  | 0.091   | 0.186   | 0.252   |
| lysine     | unk3              | < 0.001 | < 0.001 | 0.3933  | < 0.001 | < 0.001 | 0.564   |
| lysine     | 3-hydroxybutyrate | 0.003   | 0.008   | 0.2628  | < 0.001 | < 0.001 | 0.590   |
| lysine     | succinate         | 0.002   | 0.005   | 0.2703  | < 0.001 | < 0.001 | 0.844   |
| lysine     | 2-hydroxybutyrate | < 0.001 | < 0.001 | 0.5244  | 0.346   | 0.507   | 0.142   |
| lysine     | proline           | < 0.001 | < 0.001 | 0.3643  | < 0.001 | < 0.001 | 0.835   |
| methionine | leucine           | < 0.001 | < 0.001 | 0.3528  | 0.127   | 0.240   | 0.228   |
| methionine | valine            | < 0.001 | < 0.001 | 0.3413  | < 0.001 | < 0.001 | 0.610   |
| methionine | alanine           | 0.808   | 0.856   | -0.0216 | 0.001   | 0.005   | 0.472   |
| methionine | acetate           | 0.656   | 0.730   | 0.0396  | 0.010   | 0.034   | 0.376   |
| methionine | pyruvate          | 0.016   | 0.032   | 0.2108  | < 0.001 | < 0.001 | 0.578   |
| methionine | glutamine         | 0.001   | 0.003   | 0.2889  | 0.003   | 0.013   | 0.429   |
| methionine | citrate           | 0.163   | 0.230   | 0.1234  | < 0.001 | < 0.001 | 0.509   |
| methionine | glycine           | 0.001   | 0.003   | 0.2789  | < 0.001 | < 0.001 | 0.510   |
| methionine | creatine          | < 0.001 | < 0.001 | 0.4404  | 0.054   | 0.126   | -0.286  |
| methionine | creatinine        | < 0.001 | < 0.001 | 0.3395  | < 0.001 | < 0.001 | 0.574   |
| methionine | lactate           | 0.848   | 0.892   | 0.0171  | < 0.001 | < 0.001 | 0.557   |
| methionine | glucose           | < 0.001 | < 0.001 | 0.3232  | < 0.001 | < 0.001 | 0.663   |
| methionine | mannose           | 0.014   | 0.029   | 0.2158  | 0.075   | 0.161   | 0.265   |
| methionine | tyrosine          | 0.054   | 0.092   | 0.1701  | 0.010   | 0.034   | 0.378   |
| methionine | histidine         | 0.086   | 0.135   | 0.1516  | 0.002   | 0.009   | 0.437   |
| methionine | formate           | 0.608   | 0.688   | 0.0456  | 0.005   | 0.019   | 0.409   |
| methionine | lysine            | < 0.001 | < 0.001 | 0.4765  | 0.139   | 0.256   | -0.221  |
| methionine | acetatoacetate    | 0.012   | 0.025   | 0.2217  | 0.193   | 0.329   | 0.196   |
| methionine | succinate         | 0.094   | 0.145   | 0.1479  | < 0.001 | < 0.001 | -0.514  |
| methionine | 2-hydroxybutyrate | < 0.001 | < 0.001 | 0.4144  | 0.292   | 0.448   | 0.159   |
| methionine | proline           | 0.044   | 0.077   | 0.1779  | < 0.001 | < 0.001 | -0.504  |
| proline    | leucine           | < 0.001 | < 0.001 | 0.3078  | 0.032   | 0.085   | 0.3170  |
| proline    | isoleucine        | 0.033   | 0.060   | 0.1878  | < 0.001 | < 0.001 | 0.5774  |
| proline    | valine            | 0.001   | 0.003   | 0.2879  | 0.001   | 0.005   | -0.4883 |
| proline    | alanine           | 0.008   | 0.018   | 0.2310  | < 0.001 | < 0.001 | -0.5671 |
| proline    | acetate           | < 0.001 | < 0.001 | 0.3043  | 0.093   | 0.189   | -0.2503 |
| proline    | pyruvate          | < 0.001 | < 0.001 | 0.3281  | < 0.001 | < 0.001 | -0.5362 |
| proline    | acetone           | < 0.001 | < 0.001 | 0.4827  | 0.933   | 0.966   | -0.0127 |
| proline    | glutamine         | < 0.001 | < 0.001 | 0.3588  | 0.479   | 0.629   | -0.1070 |
| proline    | citrate           | 0.003   | 0.008   | 0.2572  | 0.019   | 0.056   | -0.3447 |
| proline    | glycine           | 0.003   | 0.008   | 0.2584  | 0.002   | 0.009   | -0.4534 |
| proline    | creatine          | 0.064   | 0.106   | 0.1638  | < 0.001 | < 0.001 | 0.7311  |
| proline    | creatinine        | 0.001   | 0.003   | 0.2874  | 0.063   | 0.142   | -0.2764 |
| proline    | lactate           | 0.001   | 0.003   | 0.2871  | 0.007   | 0.025   | -0.3939 |
| proline    | glucose           | < 0.001 | < 0.001 | 0.3076  | < 0.001 | < 0.001 | -0.6027 |
| proline    | mannose           | 0.253   | 0.323   | 0.1015  | 0.012   | 0.039   | -0.3667 |
| proline    | tyrosine          | 0.075   | 0.119   | 0.1573  | 0.007   | 0.025   | -0.3896 |
| proline    | histidine         | 0.008   | 0.018   | 0.2318  | 0.003   | 0.013   | -0.4270 |
| proline    | lysine            | < 0.001 | < 0.001 | 0.3643  | < 0.001 | < 0.001 | 0.8349  |
| proline    | acetatoacetate    | < 0.001 | < 0.001 | 0.5202  | 0.680   | 0.798   | 0.0624  |
| proline    | methionine        | 0.044   | 0.077   | 0.1779  | < 0.001 | < 0.001 | -0.5040 |
| proline    | unk2              | 0.008   | 0.018   | 0.2340  | 0.463   | 0.617   | 0.1109  |
| proline    | unk3              | 0.105   | 0.157   | 0.1434  | 0.016   | 0.049   | 0.3525  |
| proline    | 3-hydroxybutyrate | < 0.001 | < 0.001 | 0.5540  | < 0.001 | < 0.001 | 0.7047  |

|         |                   |       |       |        |         |         |        |
|---------|-------------------|-------|-------|--------|---------|---------|--------|
| proline | succinate         | 0.001 | 0.003 | 0.2894 | < 0.001 | < 0.001 | 0.9766 |
| proline | 2-hydroxybutyrate | 0.001 | 0.003 | 0.2844 | 0.371   | 0.532   | 0.1351 |

**Supplementary Table 8. Analysis of correlation between the metabolite levels identified by NMR analysis and the AE scores collected from DS patients subjected to Griffiths-III test (n=22).** The table contains the statistically significant correlations between metabolites analyzed with 1H-NMR from plasma samples and the two main AE scores obtained by Griffiths-III test: Scale A and B AE scores from Griffiths III test (G A AE, and G B AE, respectively). We reported p-value and r for each metabolite.

| METABOLITE        | COGNITIVE TEST | P-value | r       |
|-------------------|----------------|---------|---------|
| leucine           | G A AE         | 0.951   | -0.0140 |
| isoleucine        | G A AE         | 0.991   | -0.0020 |
| valine            | G A AE         | 0.581   | -0.1280 |
| alanine           | G A AE         | 0.577   | -0.1290 |
| acetate           | G A AE         | 0.590   | -0.1250 |
| pyruvate          | G A AE         | 0.671   | -0.0980 |
| acetone           | G A AE         | 0.525   | 0.1470  |
| glutamine         | G A AE         | 0.959   | 0.0120  |
| citrate           | G A AE         | 0.435   | 0.1800  |
| glycine           | G A AE         | 0.528   | 0.1460  |
| creatine          | G A AE         | 0.598   | -0.1220 |
| creatinine        | G A AE         | 0.472   | 0.1660  |
| lactate           | G A AE         | 0.952   | 0.0140  |
| glucose           | G A AE         | 0.390   | -0.1980 |
| mannose           | G A AE         | 0.466   | 0.1680  |
| tyrosine          | G A AE         | 0.193   | -0.2960 |
| histidine         | G A AE         | 0.746   | 0.0750  |
| phenylalanine     | G A AE         | 0.542   | -0.1410 |
| formate           | G A AE         | 0.882   | 0.0350  |
| fumarate          | G A AE         | 0.484   | 0.1620  |
| threonine         | G A AE         | 0.070   | 0.4030  |
| lysine            | G A AE         | 0.657   | -0.1030 |
| acetatoacetate    | G A AE         | 0.512   | 0.1520  |
| methionine        | G A AE         | 0.381   | -0.2010 |
| unk1              | G A AE         | 0.723   | 0.0820  |
| unk2              | G A AE         | 0.375   | -0.2040 |
| unk3              | G A AE         | 0.630   | -0.1120 |
| 3-hydroxybutyrate | G A AE         | 0.434   | 0.1800  |
| succinate         | G A AE         | 0.842   | 0.0460  |
| 2-hydroxybutyrate | G A AE         | 0.475   | 0.1650  |
| proline           | G A AE         | 0.821   | 0.0530  |

| METABOLITE        | COGNITIVE TEST | P-value | r       |
|-------------------|----------------|---------|---------|
| leucine           | G B AE         | 0.791   | 0.0610  |
| isoleucine        | G B AE         | 0.501   | 0.1560  |
| valine            | G B AE         | 0.762   | -0.0700 |
| alanine           | G B AE         | 0.867   | -0.0390 |
| acetate           | G B AE         | 0.273   | -0.2510 |
| pyruvate          | G B AE         | 0.540   | 0.1420  |
| acetone           | G B AE         | 0.193   | 0.2960  |
| glutamine         | G B AE         | 0.819   | 0.0530  |
| citrate           | G B AE         | 0.173   | 0.3090  |
| glycine           | G B AE         | 0.558   | 0.1350  |
| creatine          | G B AE         | 0.666   | 0.1000  |
| creatinine        | G B AE         | 0.106   | 0.3630  |
| lactate           | G B AE         | 0.557   | 0.1360  |
| glucose           | G B AE         | 0.216   | -0.2820 |
| mannose           | G B AE         | 0.596   | 0.1230  |
| tyrosine          | G B AE         | 0.075   | -0.3970 |
| histidine         | G B AE         | 0.305   | 0.2350  |
| phenylalanine     | G B AE         | 0.507   | -0.1530 |
| formate           | G B AE         | 0.727   | -0.0810 |
| fumarate          | G B AE         | 0.747   | 0.0750  |
| threonine         | G B AE         | 0.401   | 0.1930  |
| lysine            | G B AE         | 0.978   | -0.0060 |
| acetatoacetate    | G B AE         | 0.266   | 0.2540  |
| methionine        | G B AE         | 0.850   | 0.0440  |
| unk1              | G B AE         | 0.665   | 0.1000  |
| unk2              | G B AE         | 0.837   | -0.0480 |
| unk3              | G B AE         | 0.442   | -0.1770 |
| 3-hydroxybutyrate | G B AE         | 0.196   | 0.2940  |
| succinate         | G B AE         | 0.715   | 0.0850  |
| 2-hydroxybutyrate | G B AE         | 0.439   | 0.1780  |
| proline           | G B AE         | 0.929   | -0.0210 |

**Supplementary Table 9. Analysis of correlations between the metabolite levels identified by NMR analysis and the AE scores collected from DS patients subjected to WPPSI test (n=39).** The table contains the statistically significant correlations between metabolites analyzed with 1H-NMR from plasma samples and the three main AE scores obtained by WPPSI test: Verbal, Non Verbal and Total age equivalent scores from WPPSI test (W Verb AE, W Non Verb AE, W Tot AE, respectively). We reported p-value and r for each metabolite.

| METABOLITE        | COGNITIVE TEST | P-value | r       |
|-------------------|----------------|---------|---------|
| leucine           | W Verb AE      | 0.302   | 0.1718  |
| isoleucine        | W Verb AE      | 0.649   | -0.0764 |
| valine            | W Verb AE      | 0.341   | 0.1587  |
| alanine           | W Verb AE      | 0.921   | -0.0167 |
| acetate           | W Verb AE      | 0.140   | 0.2439  |
| pyruvate          | W Verb AE      | 0.783   | 0.0463  |
| acetone           | W Verb AE      | 0.964   | -0.0076 |
| glutamine         | W Verb AE      | 0.127   | 0.2518  |
| citrate           | W Verb AE      | 0.099   | 0.2714  |
| glycine           | W Verb AE      | 0.241   | 0.1950  |
| creatine          | W Verb AE      | 0.544   | 0.1015  |
| creatinine        | W Verb AE      | 0.130   | 0.2502  |
| lactate           | W Verb AE      | 0.909   | 0.0192  |
| glucose           | W Verb AE      | 0.291   | 0.1757  |
| mannose           | W Verb AE      | 0.099   | 0.2715  |
| tyrosine          | W Verb AE      | 0.813   | 0.0397  |
| histidine         | W Verb AE      | 0.399   | 0.1409  |
| phenylalanine     | W Verb AE      | 0.628   | 0.0812  |
| formate           | W Verb AE      | 0.126   | 0.2525  |
| fumarate          | W Verb AE      | 0.490   | -0.1156 |
| threonine         | W Verb AE      | 0.229   | 0.1998  |
| lysine            | W Verb AE      | 0.168   | 0.2281  |
| acetatoacetate    | W Verb AE      | 0.909   | 0.0192  |
| methionine        | W Verb AE      | 0.421   | -0.1343 |
| unk1              | W Verb AE      | 0.602   | 0.0874  |
| unk2              | W Verb AE      | 0.823   | -0.0374 |
| unk3              | W Verb AE      | 0.738   | 0.0562  |
| 3-hydroxybutyrate | W Verb AE      | 0.724   | 0.0591  |
| succinate         | W Verb AE      | 0.464   | 0.1223  |
| 2-hydroxybutyrate | W Verb AE      | 0.171   | 0.2267  |
| proline           | W Verb AE      | 0.260   | -0.1872 |

| METABOLITE        | COGNITIVE TEST | P-value | r       |
|-------------------|----------------|---------|---------|
| leucine           | W Non Verb AE  | 0.395   | 0.1419  |
| isoleucine        | W Non Verb AE  | 0.794   | 0.0438  |
| valine            | W Non Verb AE  | 0.323   | 0.1646  |
| alanine           | W Non Verb AE  | 0.116   | -0.2593 |
| acetate           | W Non Verb AE  | 0.314   | 0.1677  |
| pyruvate          | W Non Verb AE  | 0.228   | 0.2004  |
| acetone           | W Non Verb AE  | 0.224   | 0.2021  |
| glutamine         | W Non Verb AE  | 0.354   | 0.1547  |
| citrate           | W Non Verb AE  | 0.120   | 0.2566  |
| glycine           | W Non Verb AE  | 0.749   | -0.0537 |
| creatine          | W Non Verb AE  | 0.501   | 0.1125  |
| creatinine        | W Non Verb AE  | 0.105   | 0.2672  |
| lactate           | W Non Verb AE  | 0.338   | 0.1597  |
| glucose           | W Non Verb AE  | 0.843   | -0.0331 |
| mannose           | W Non Verb AE  | 0.968   | -0.0068 |
| tyrosine          | W Non Verb AE  | 0.568   | -0.0957 |
| histidine         | W Non Verb AE  | 0.760   | 0.0511  |
| phenylalanine     | W Non Verb AE  | 0.909   | 0.0191  |
| formate           | W Non Verb AE  | 0.729   | 0.0581  |
| fumarate          | W Non Verb AE  | 0.394   | 0.1423  |
| threonine         | W Non Verb AE  | 0.553   | 0.0994  |
| lysine            | W Non Verb AE  | 0.862   | 0.0293  |
| acetatoacetate    | W Non Verb AE  | 0.781   | 0.0467  |
| methionine        | W Non Verb AE  | 0.456   | 0.1246  |
| unk1              | W Non Verb AE  | 0.125   | 0.2532  |
| unk2              | W Non Verb AE  | 0.532   | 0.1047  |
| unk3              | W Non Verb AE  | 0.607   | -0.0863 |
| 3-hydroxybutyrate | W Non Verb AE  | 0.702   | 0.0642  |
| succinate         | W Non Verb AE  | 0.264   | 0.1859  |
| 2-hydroxybutyrate | W Non Verb AE  | 0.240   | 0.1951  |
| proline           | W Non Verb AE  | 0.170   | -0.2270 |

| <b>METABOLITE</b> | <b>COGNITIVE TEST</b> | <b>P-value</b> | <b>r</b> |
|-------------------|-----------------------|----------------|----------|
| leucine           | W Tot AE              | 0.256          | 0.1889   |
| isoleucine        | W Tot AE              | 0.812          | -0.0400  |
| valine            | W Tot AE              | 0.258          | 0.1883   |
| alanine           | W Tot AE              | 0.475          | -0.1194  |
| acetate           | W Tot AE              | 0.123          | 0.2543   |
| pyruvate          | W Tot AE              | 0.482          | 0.1177   |
| acetone           | W Tot AE              | 0.644          | 0.0774   |
| glutamine         | W Tot AE              | 0.122          | 0.2549   |
| citrate           | W Tot AE              | 0.057          | 0.3118   |
| glycine           | W Tot AE              | 0.451          | 0.1260   |
| creatine          | W Tot AE              | 0.460          | 0.1234   |
| creatinine        | W Tot AE              | 0.067          | 0.3000   |
| lactate           | W Tot AE              | 0.631          | 0.0804   |
| glucose           | W Tot AE              | 0.474          | 0.1198   |
| mannose           | W Tot AE              | 0.221          | 0.2034   |
| tyrosine          | W Tot AE              | 0.956          | -0.0093  |
| histidine         | W Tot AE              | 0.444          | 0.1281   |
| phenylalanine     | W Tot AE              | 0.678          | 0.0695   |
| formate           | W Tot AE              | 0.193          | 0.2157   |
| fumarate          | W Tot AE              | 0.862          | -0.0292  |
| threonine         | W Tot AE              | 0.247          | 0.1927   |
| lysine            | W Tot AE              | 0.265          | 0.1853   |
| acetatoacetate    | W Tot AE              | 0.840          | 0.0338   |
| methionine        | W Tot AE              | 0.763          | -0.0507  |
| unk1              | W Tot AE              | 0.306          | 0.1707   |
| unk2              | W Tot AE              | 0.930          | 0.0147   |
| unk3              | W Tot AE              | 0.966          | 0.0071   |
| 3-hydroxybutyrate | W Tot AE              | 0.671          | 0.0713   |
| succinate         | W Tot AE              | 0.309          | 0.1694   |
| 2-hydroxybutyrate | W Tot AE              | 0.126          | 0.2525   |
| proline           | W Tot AE              | 0.154          | -0.2357  |
